# Supplementary material
Source: MDPI journal article supplement (https://www.mdpi.com/2673-9976/18/1/71)
Supplement: s1 [file s1]

# Gastric lipase and cholesterol esterase in the INFOGEST model: evaluation of sterol bioaccessibility in plant sterol-enriched wholemeal rye bread

**Nerea Faubel**

Mussa Makran, Amparo Alegría, Antonio Cilla, Reyes Barberá & Guadalupe Garcia-Llatas

**Nutrition and Food Science Area, Faculty of Pharmacy, University of Valencia, Spain**

**BIONUTEST research group**

This study is part of the project PID2019-104167RB-I00 funded by MCIN/AEI/10.13039/501100011033

# Table of contents

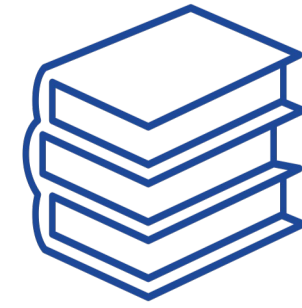

## **INTRODUCTION**

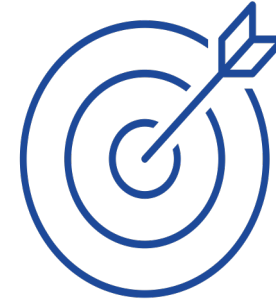

## **OBJECTIVE**

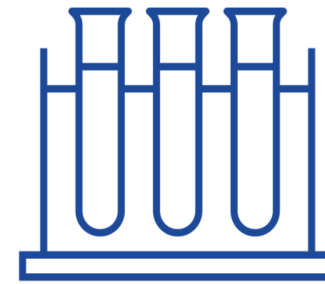

## **MATERIALS AND METHODS**

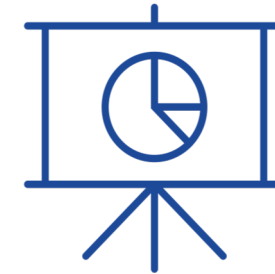

## **RESULTS AND DISCUSSION**

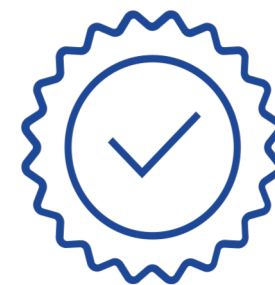

## **CONCLUSION**

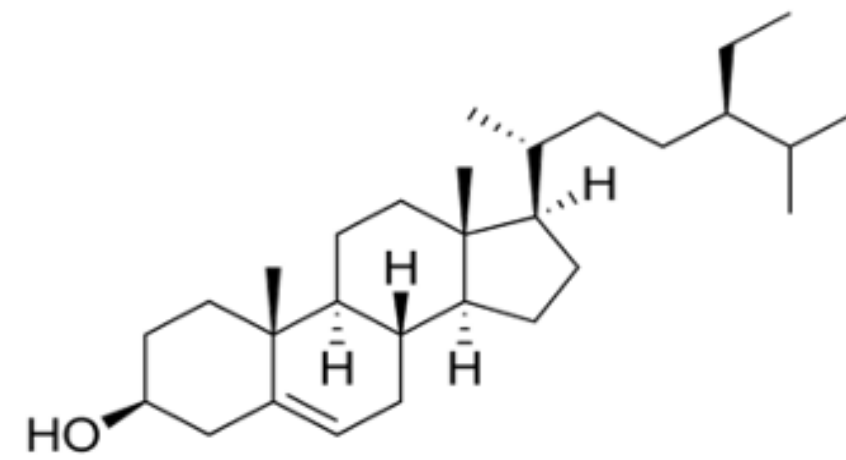 **$\beta$ -Sitosterol**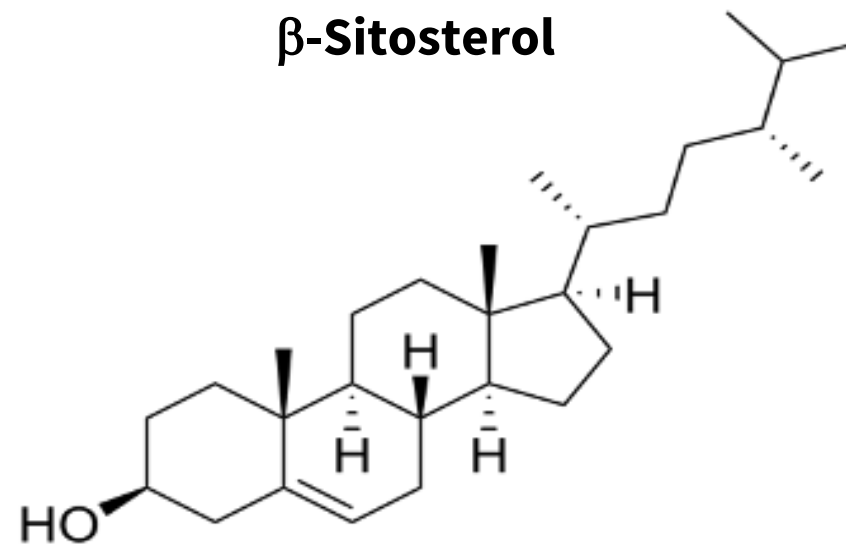**Campesterol**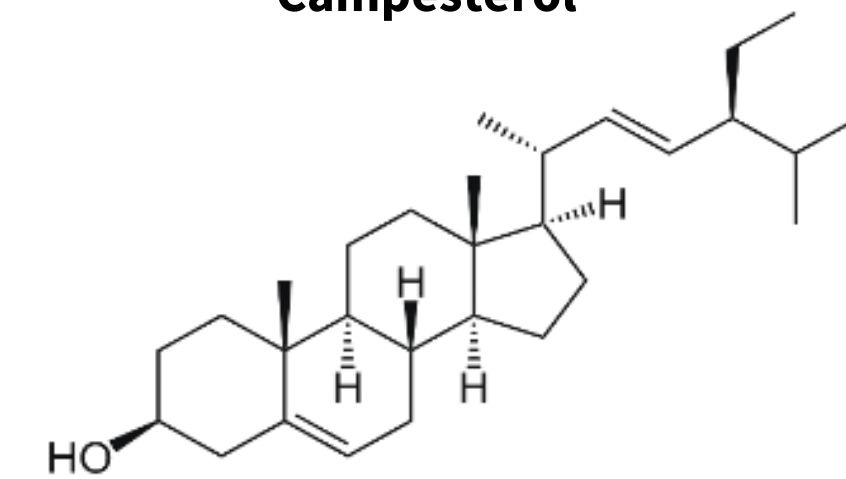**Stigmasterol****Plant sterols**

 $\beta$ -Sitosterol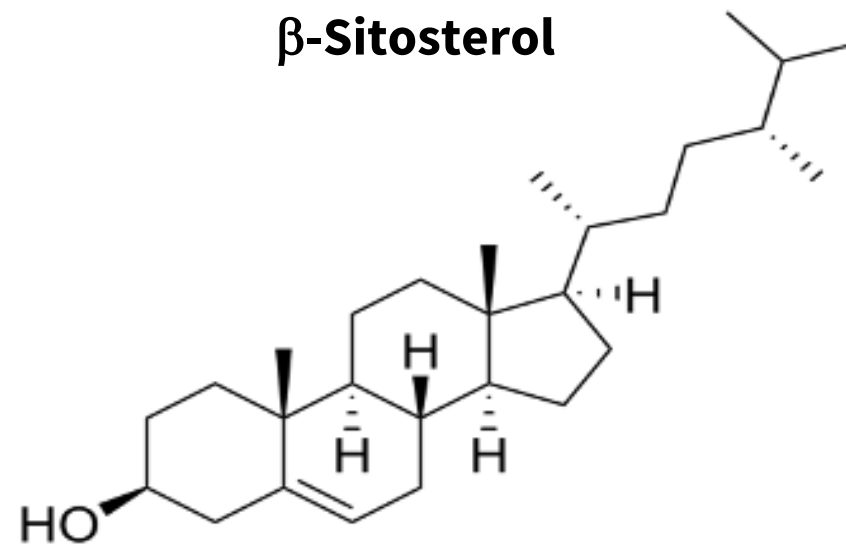

Campesterol

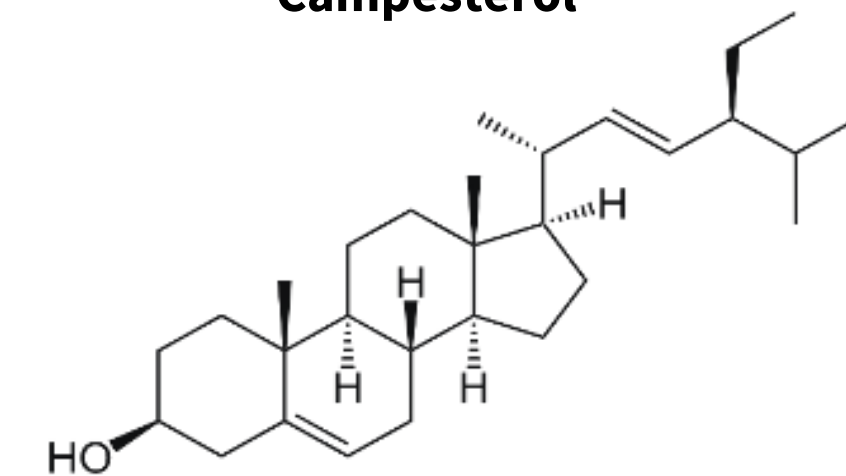

Stigmasterol

Plant sterols

**Hypocholesterolemic effect:**

1.5-3 g PS/day

⇓ LDL-c: 7-12.5%

**β-Sitosterol****Campesterol****Stigmasterol**

Plant sterols

Hypocholesterolemic effect:

1.5-3 g PS/day

⇓ LDL-c: 7-12.5%

Daily intake

**Western diet**  
276 mg/day**Vegan diet**  
~1000 mg/day

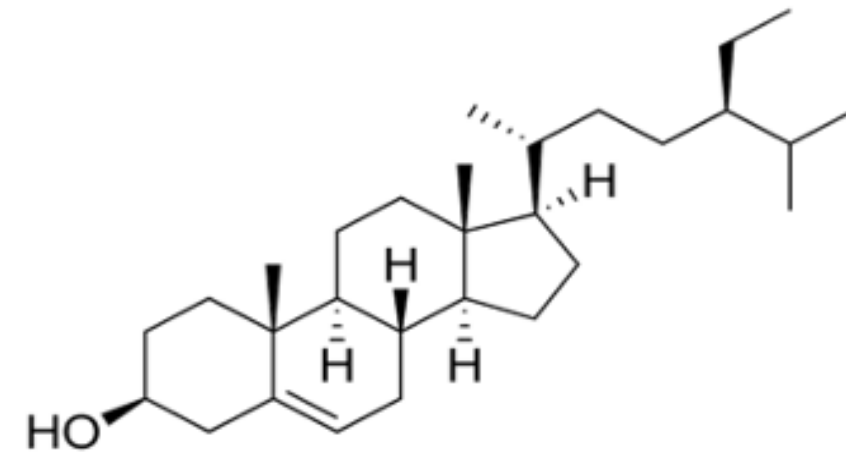 **$\beta$ -Sitosterol**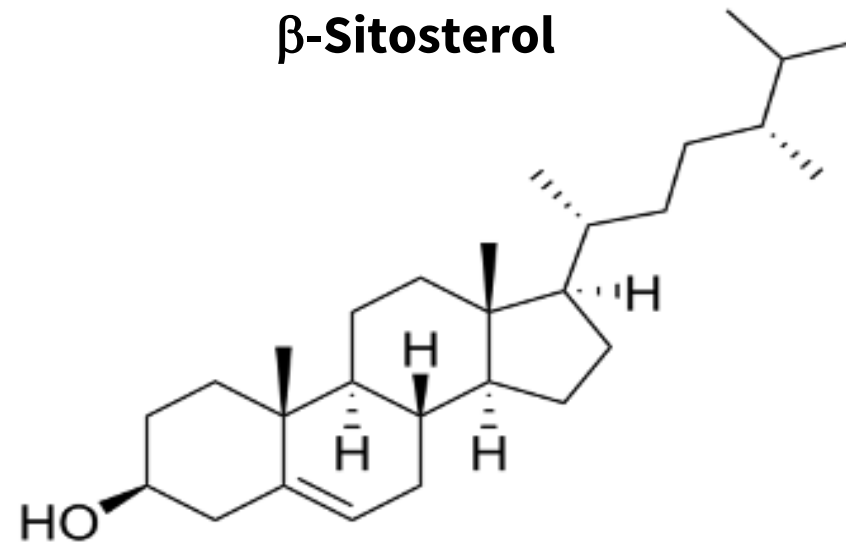**Campesterol**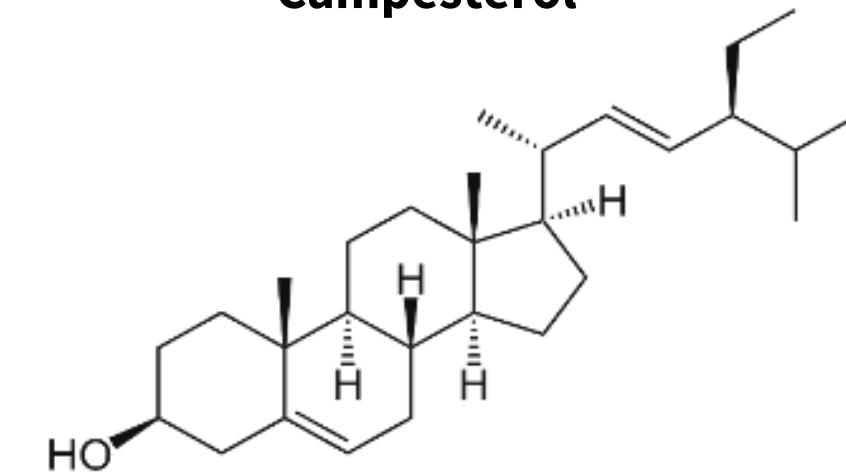**Stigmasterol**

Plant sterols

**Enriched food**

Hypocholesterolemic effect:

1.5-3 g PS/day

⇓ LDL-c: 7-12.5%

Daily intake

**Western diet**  
276 mg/day**Vegan diet**  
~1000 mg/dayWholemeal rye  
bread

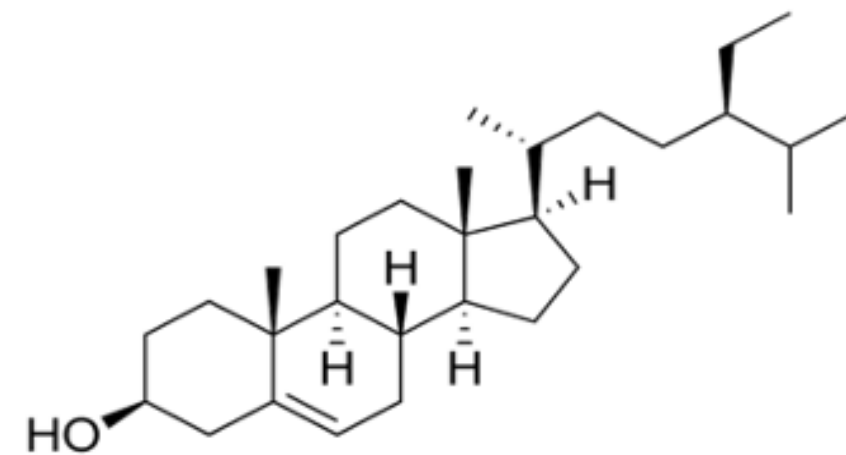 $\beta$ -Sitosterol

Campesterol



Stigmasterol

Plant sterols

Enriched food

Wholemeal rye  
bread

European Union

Decision 2006/58/EC, Decision 2006/59/EC

Hypocholesterolemic effect:

1.5-3 g PS/day

⇓ LDL-c: 7-12.5%

Daily intake

Western diet  
276 mg/dayVegan diet  
~1000 mg/day

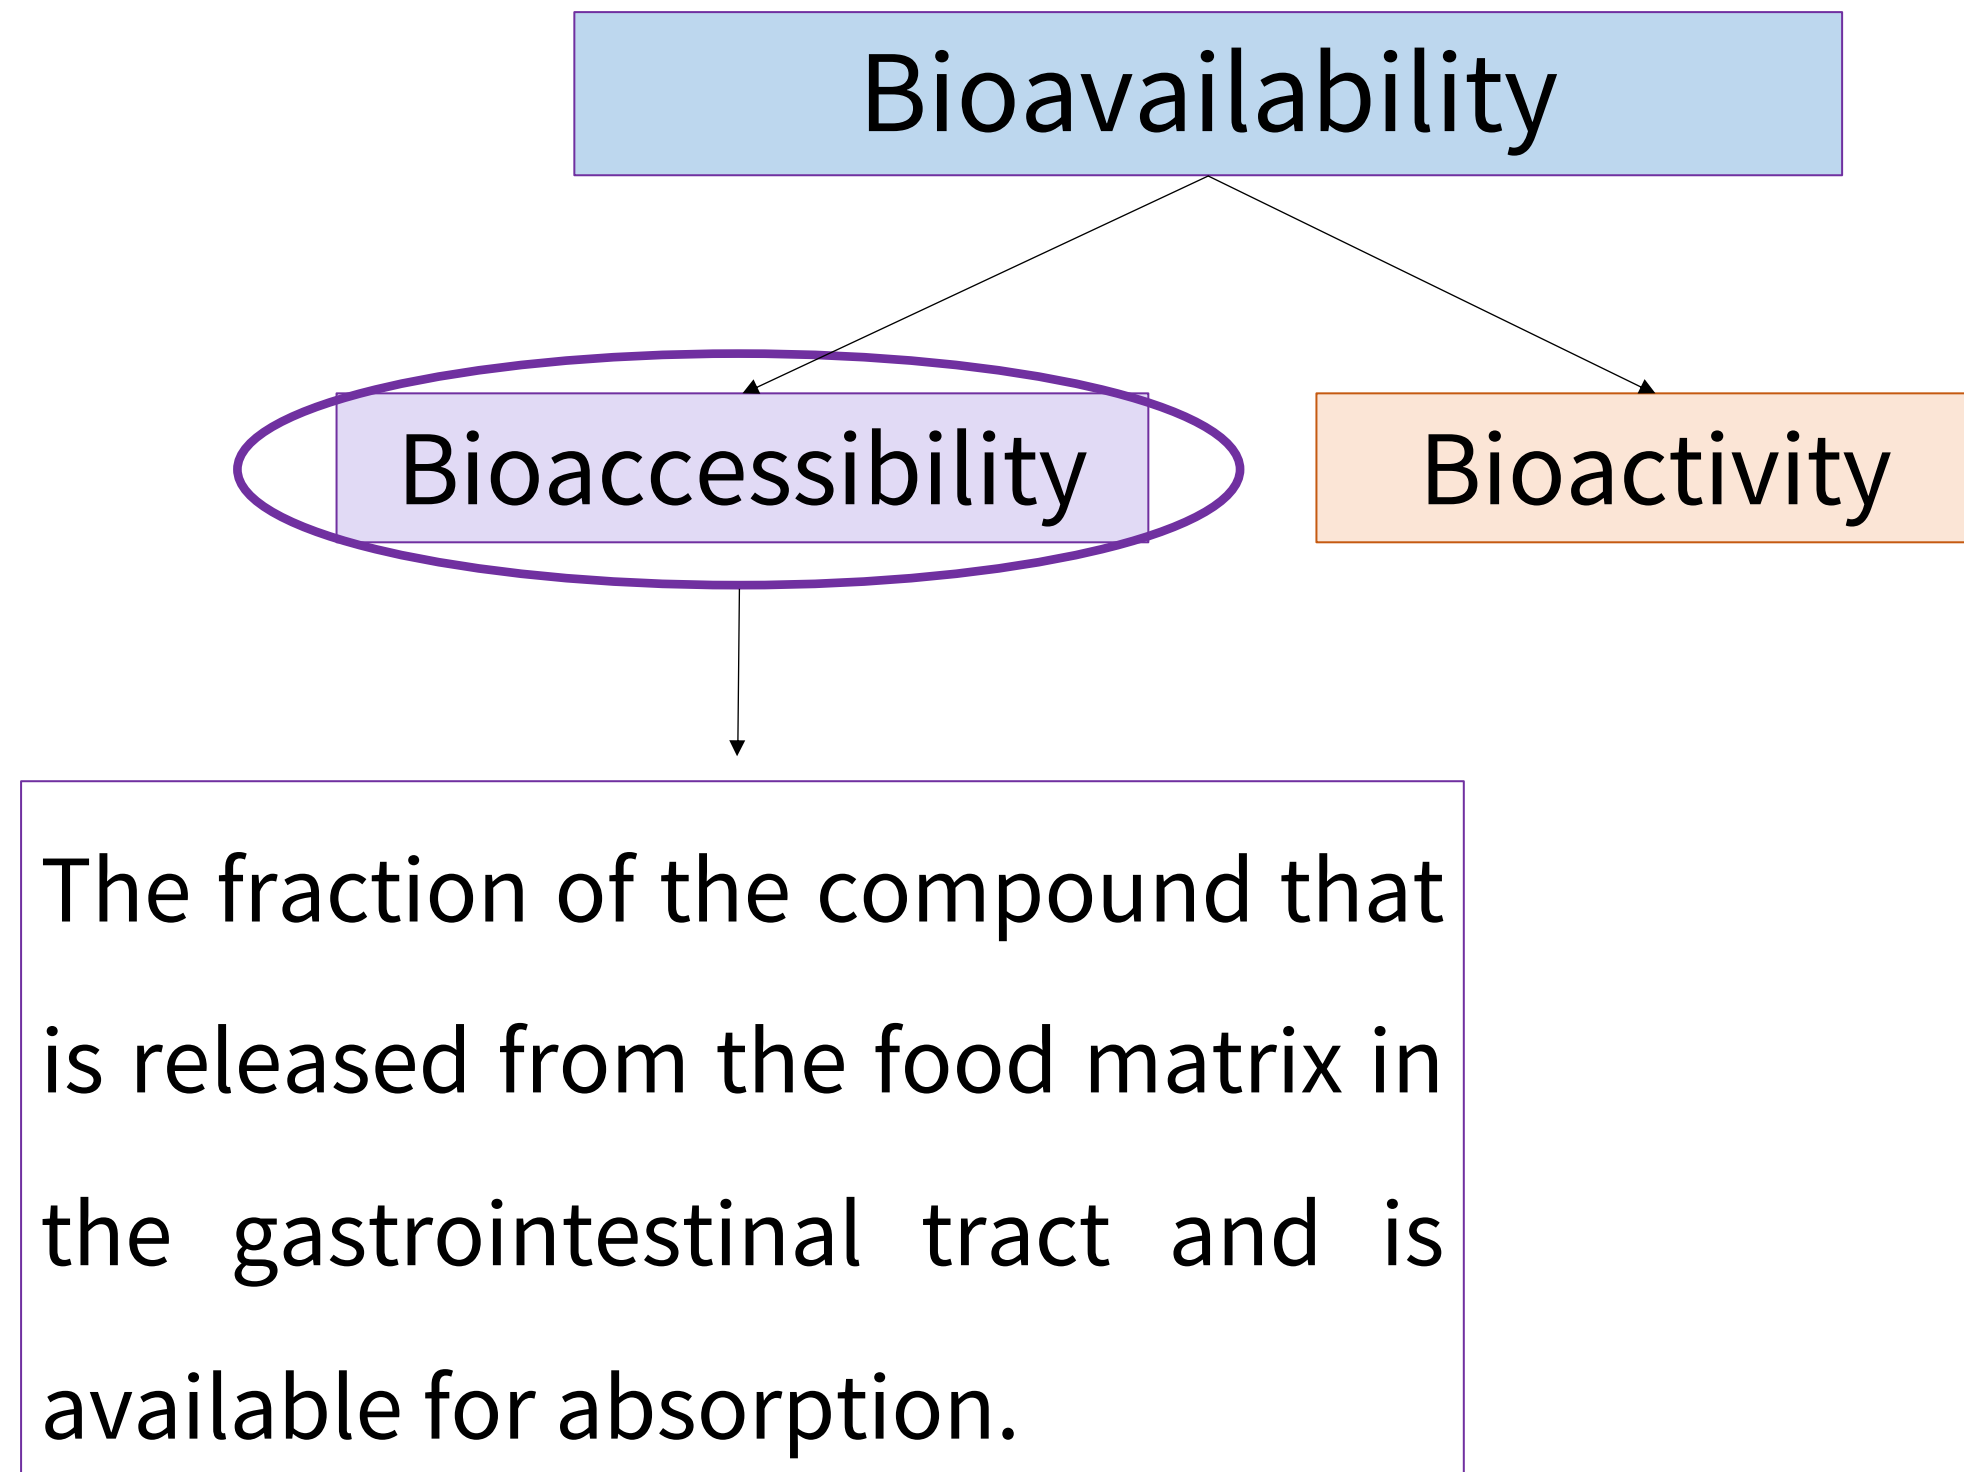



# Bioavailability

Bioaccessibility

Bioactivity

*In vitro* methods

Dynamic

Semi-dynamic

Static

Monocompartimentals

Multicompartimentals

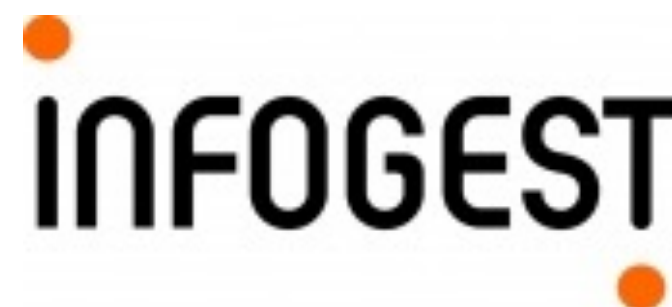

COST FA 1005 Infogest  
“Improving Health Properties of  
Food by Sharing our Knowledge  
on the Digestive Process”

To assess the impact of gastric lipase and cholesterol esterase, as key enzymes of lipid metabolism, in the INFOGEST digestion method on plant sterol bioaccessibility in a plant sterol-enriched wholemeal rye bread.

# INFOGEST

Minekus et al. (2014)

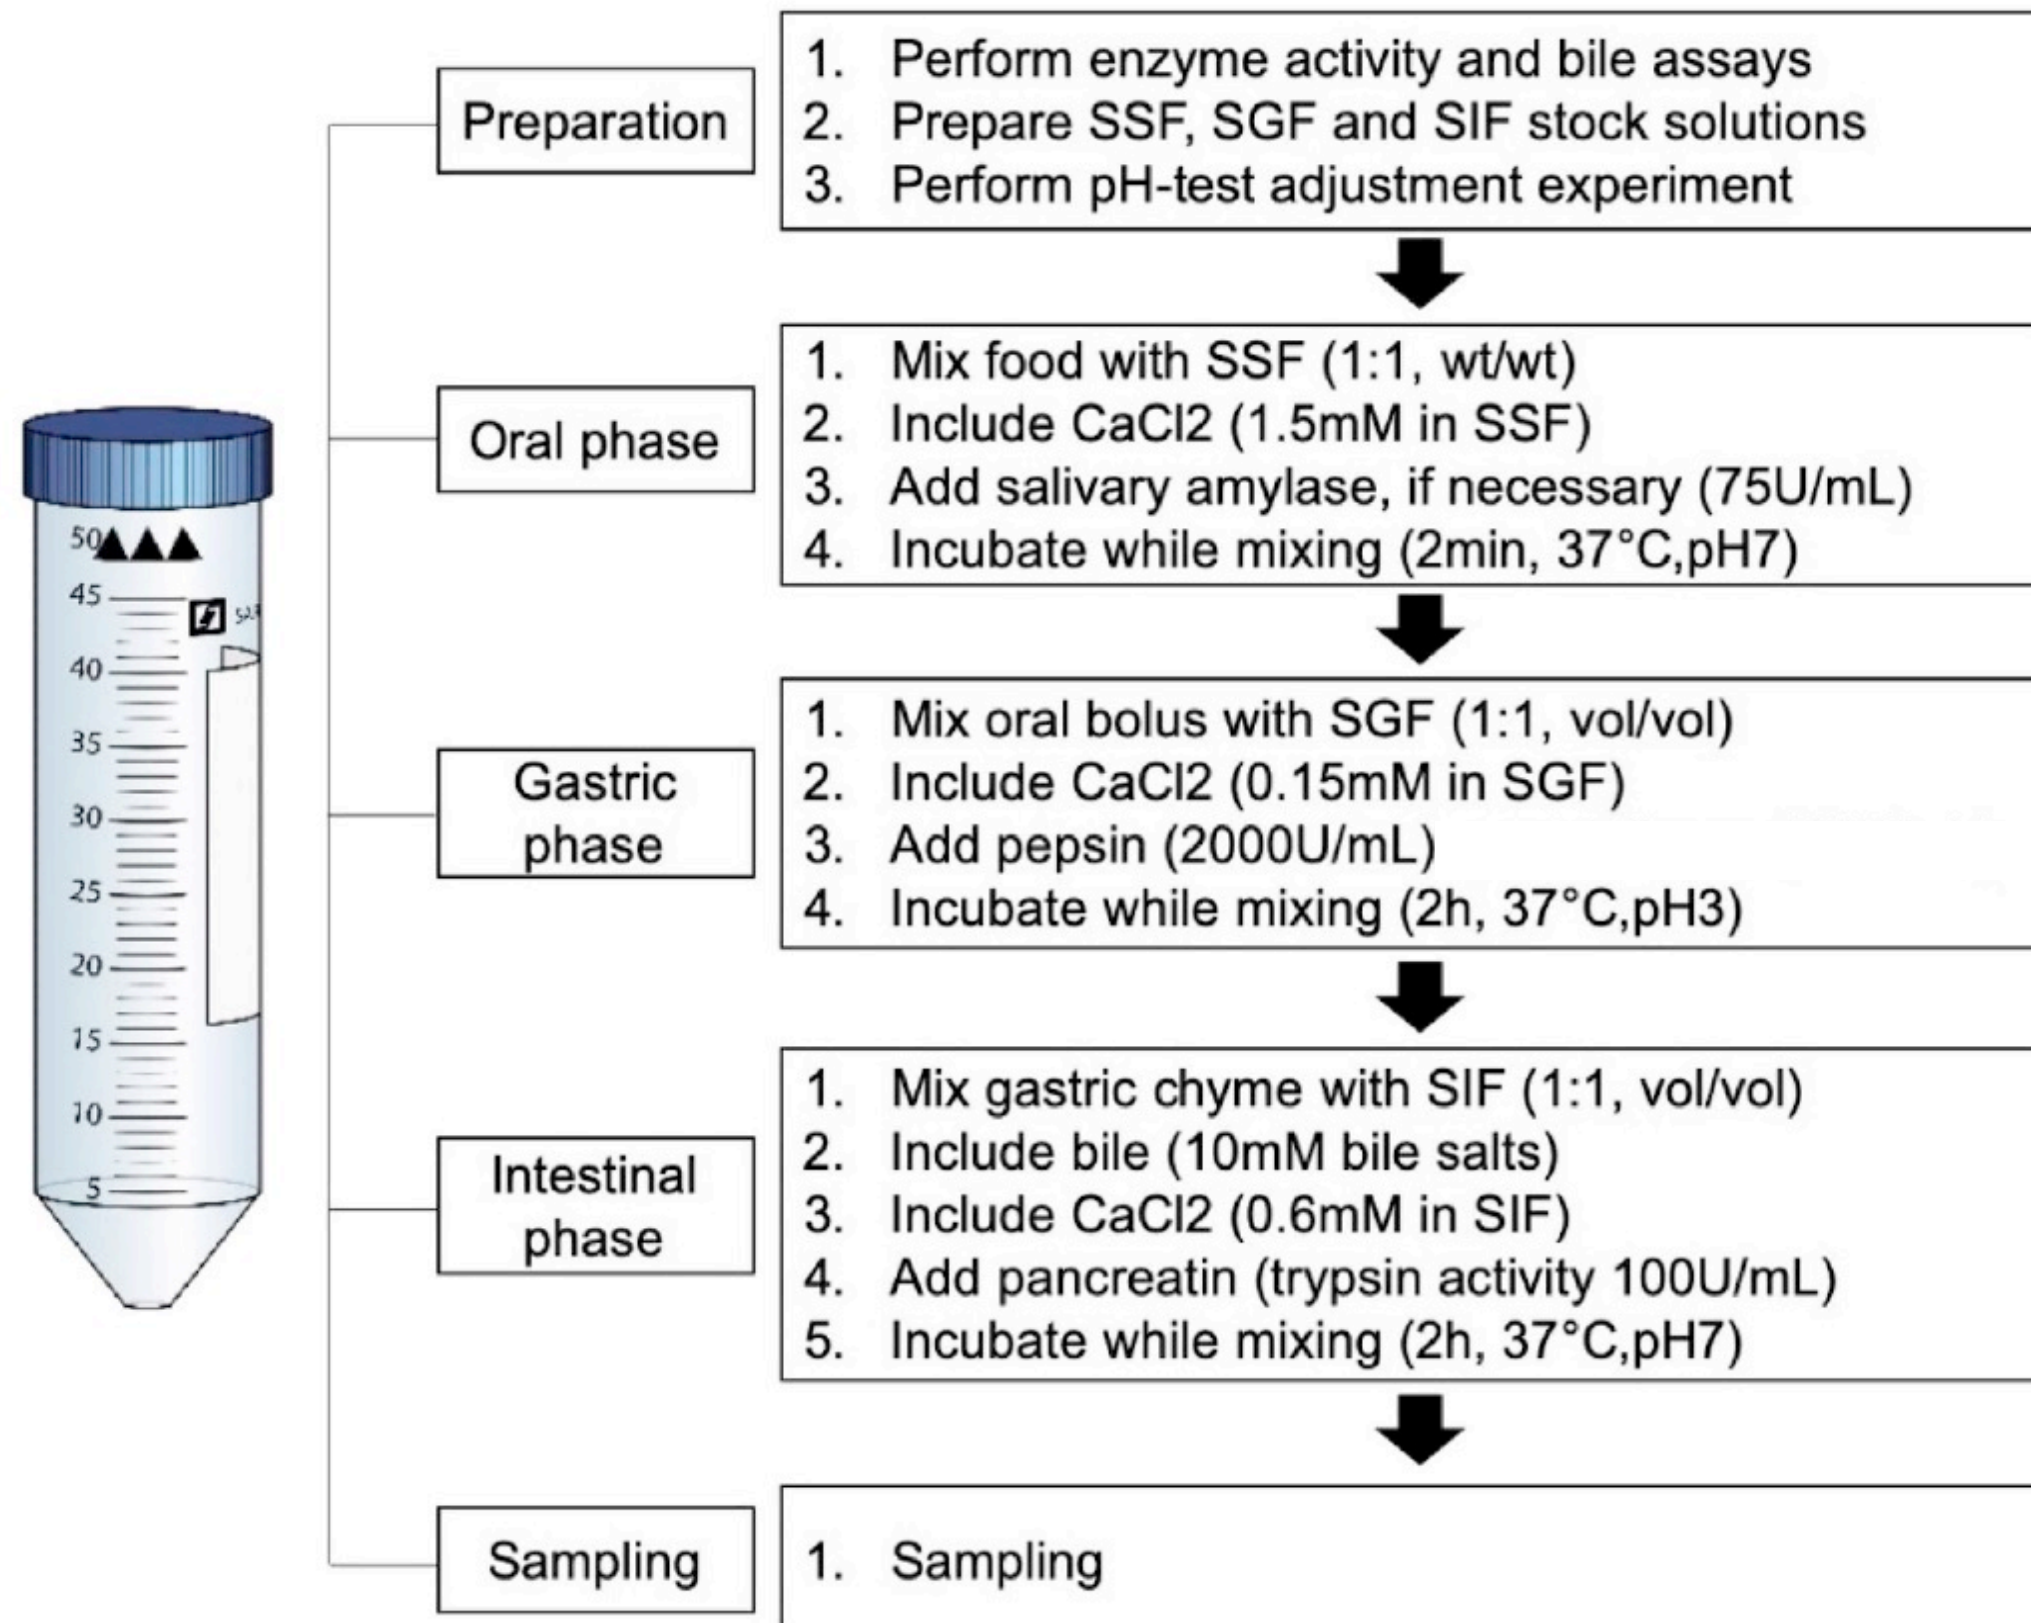

# INFOGEST

Minekus et al. (2014)

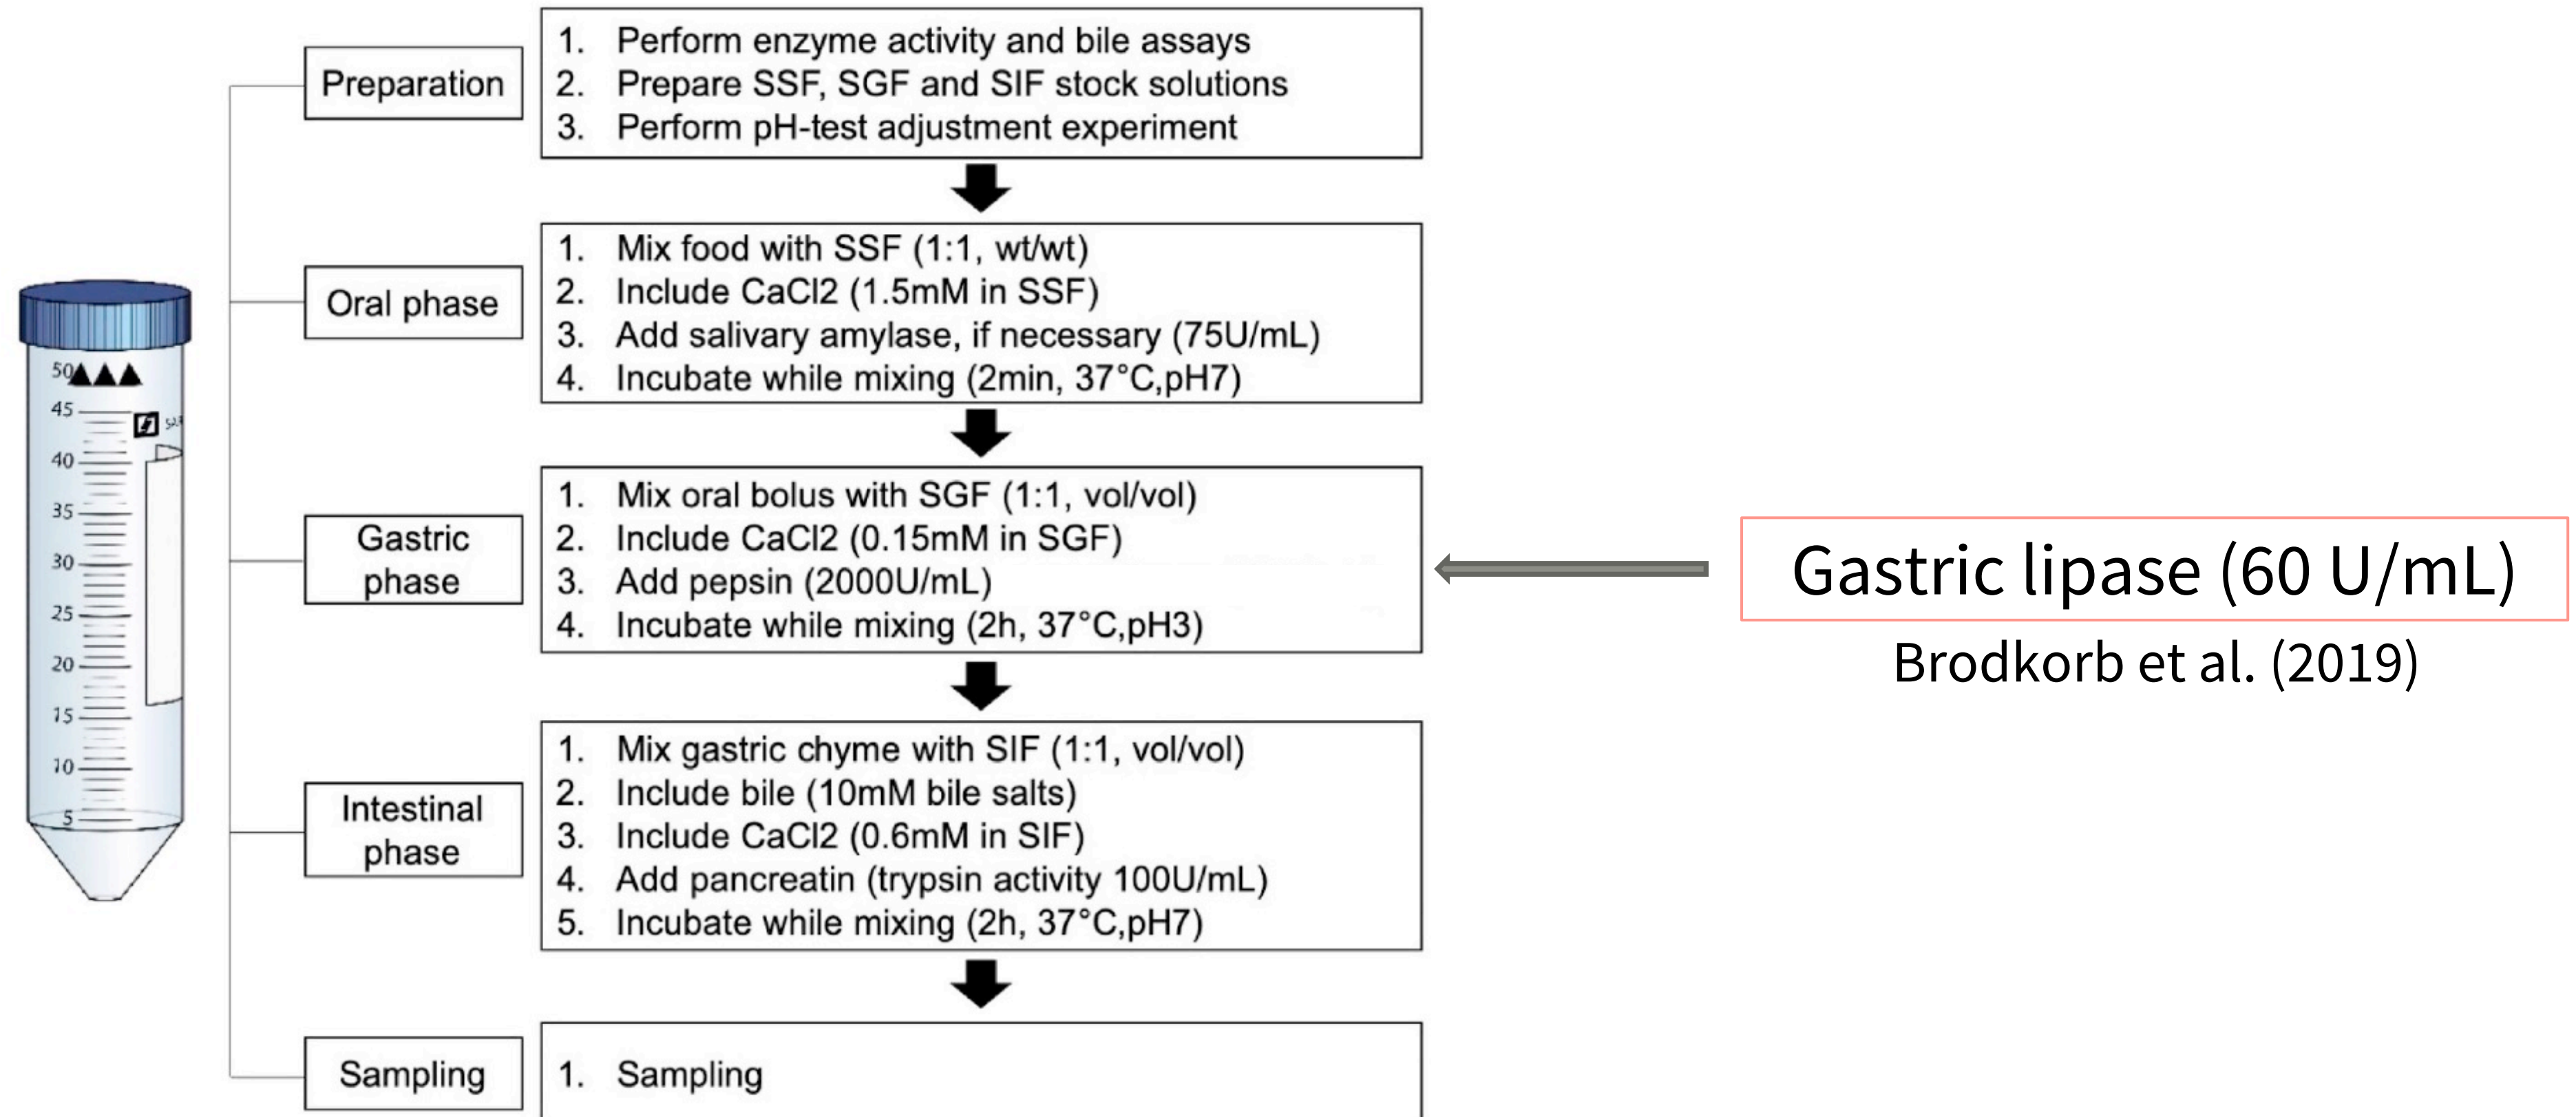



# INFOGEST

Minekus et al. (2014)

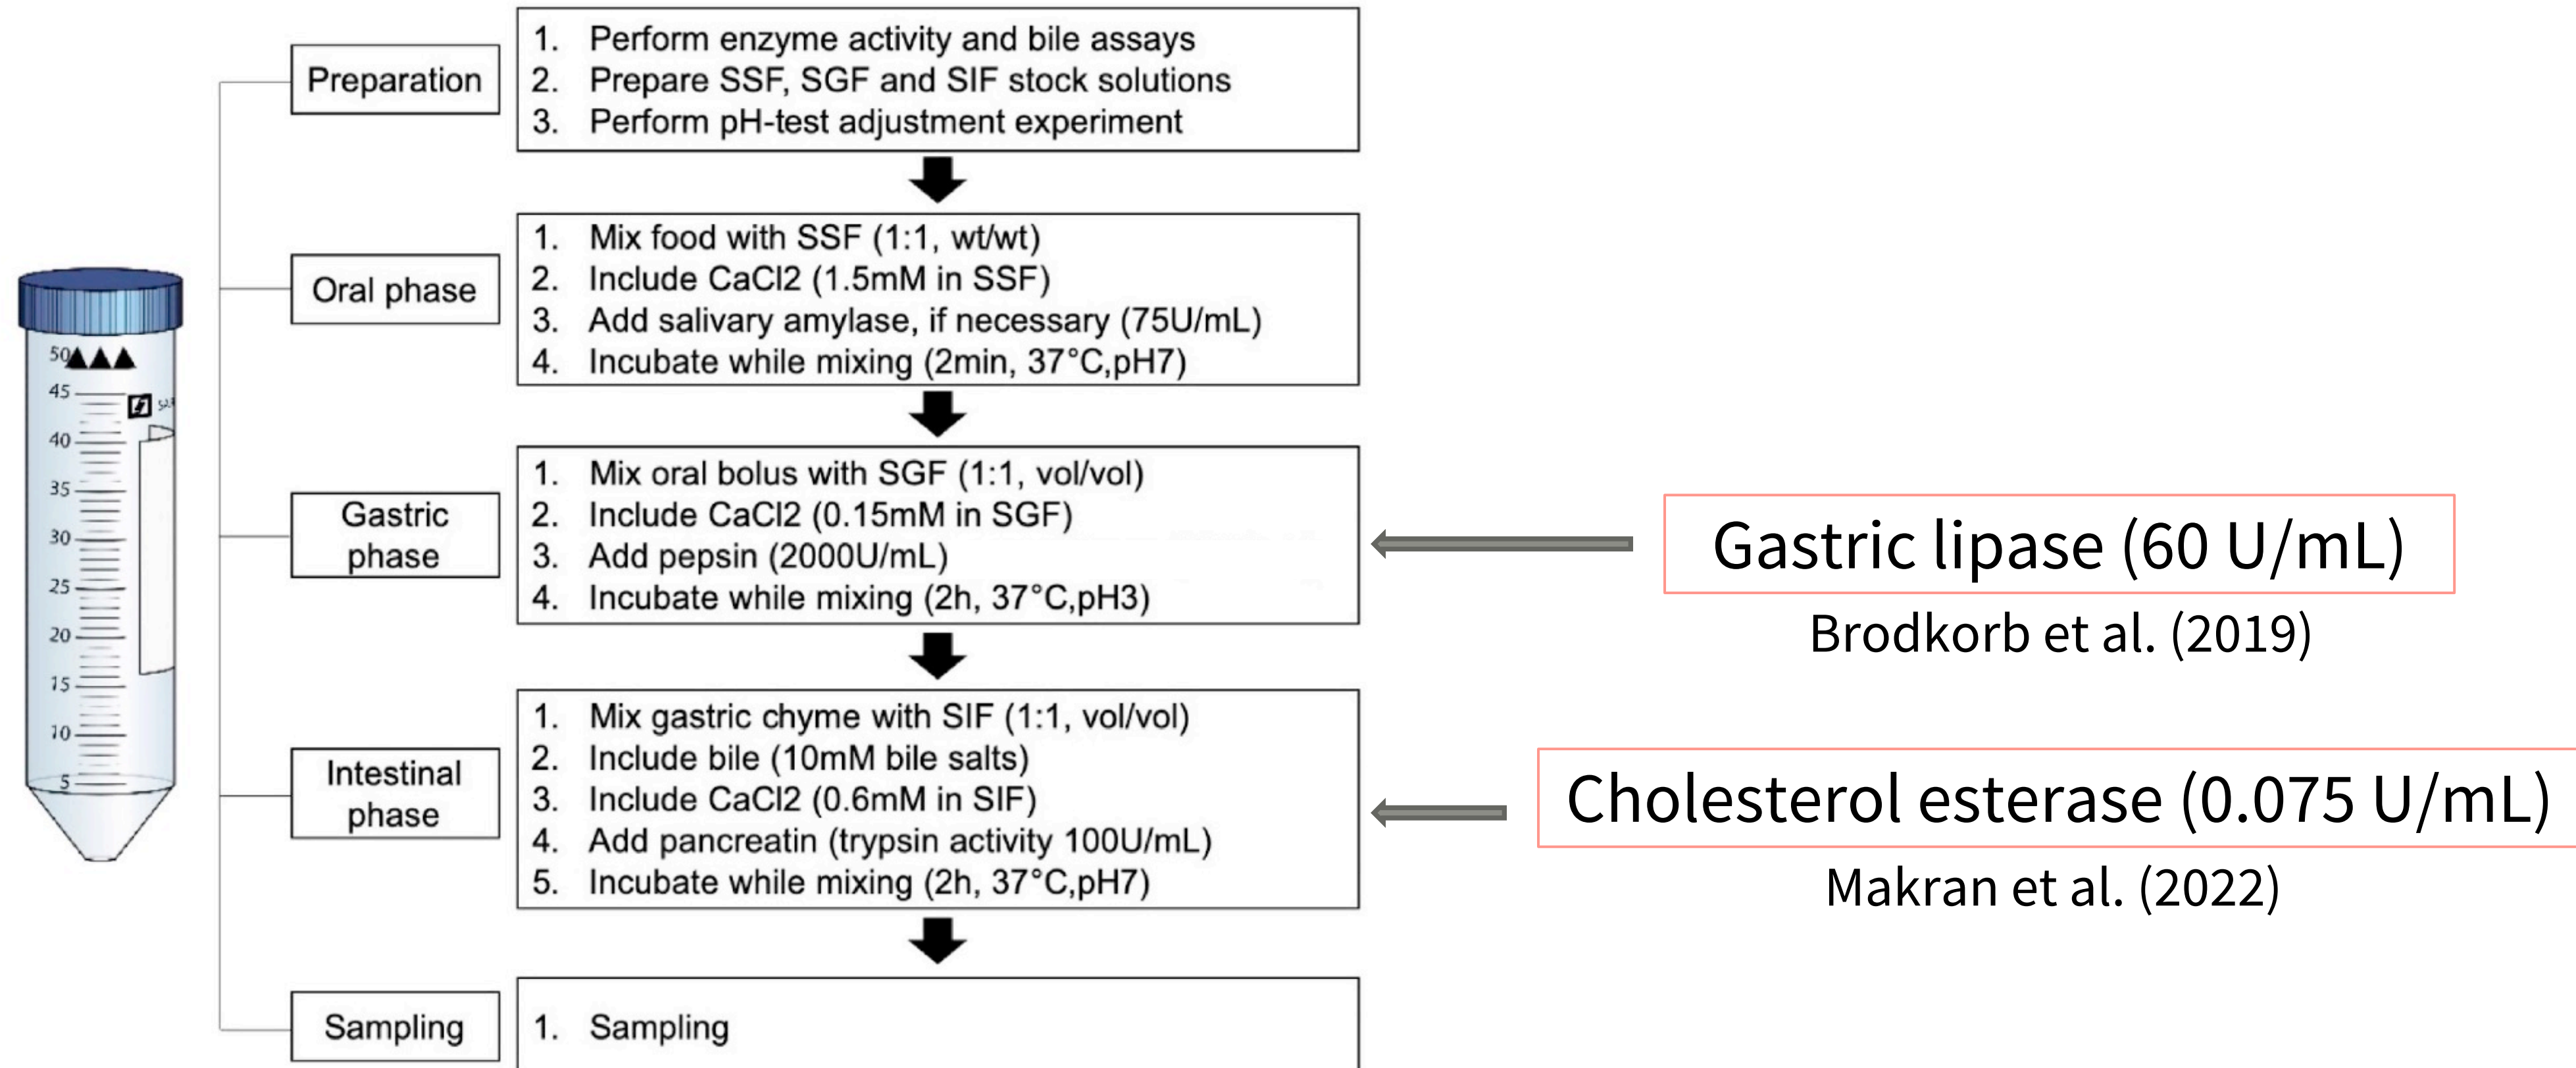

# INFOGEST

Minekus et al. (2014)

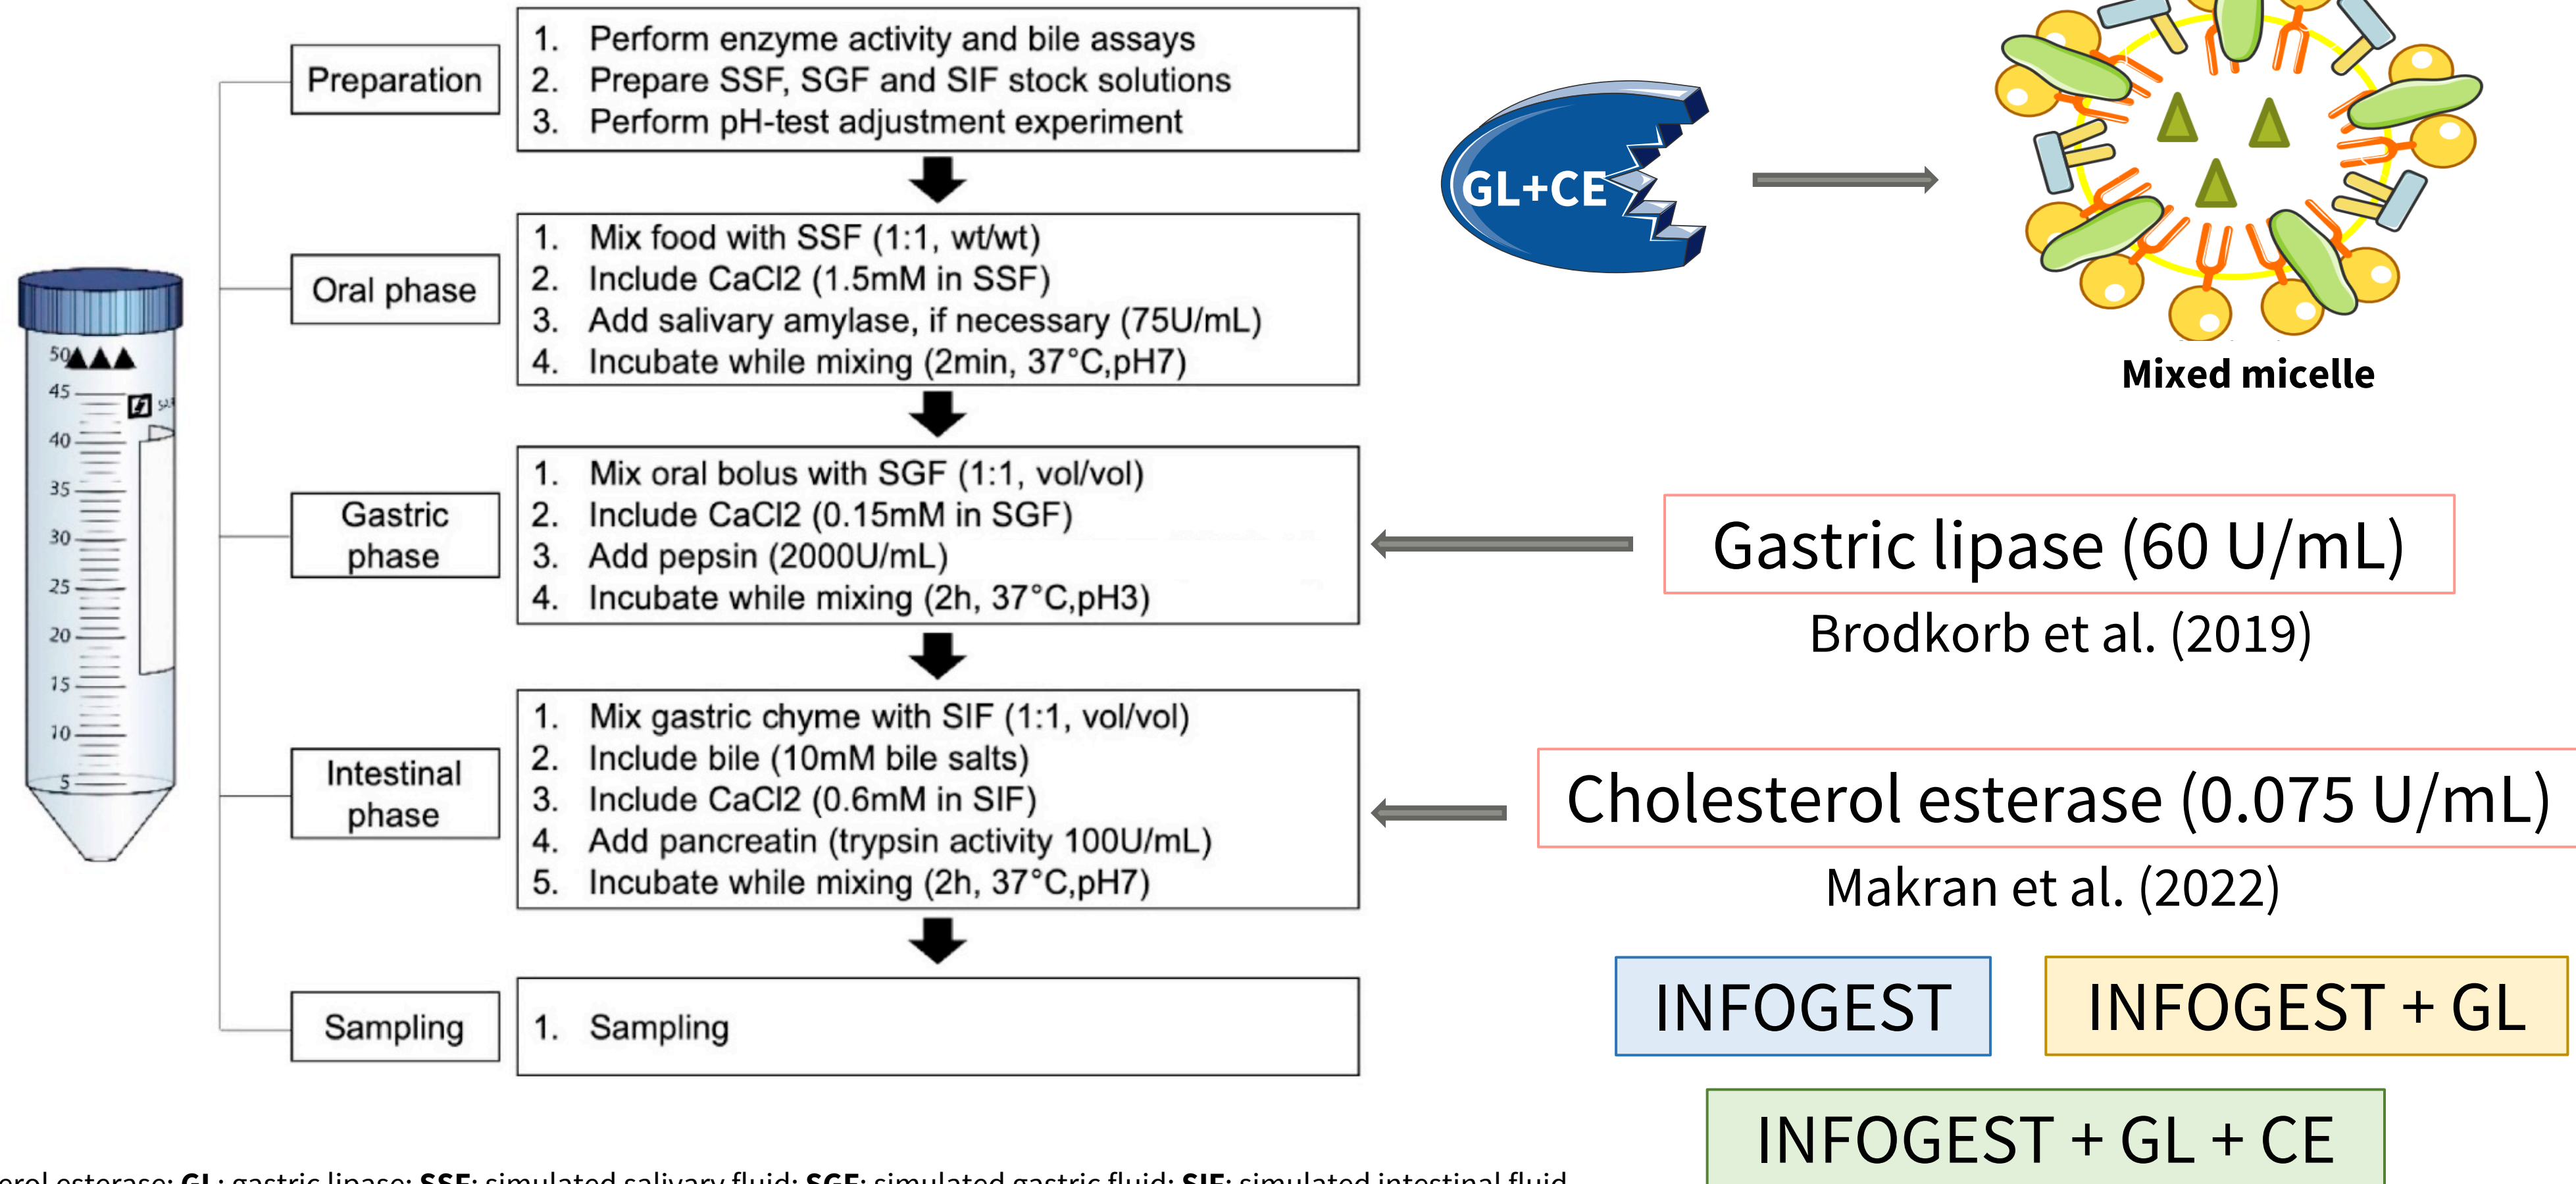

## Samples

- Plant sterol-enriched wholemeal rye bread fortified with an ingredient containing microencapsulated free plant sterols (1.8 g plant sterols/80 g rye bread) from tall oil.

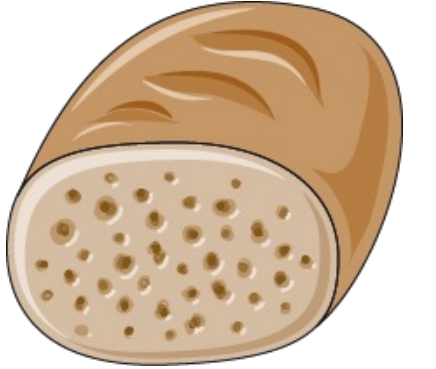

↓ Simulated  
digestion

INFOGEST

INFOGEST + GL

INFOGEST + GL + CE

- Bioaccessible fraction

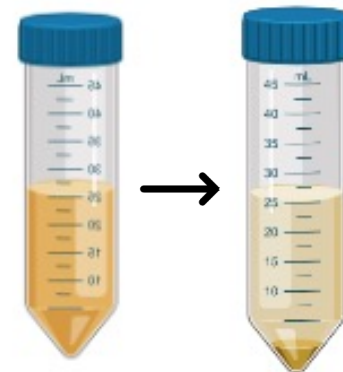



## Samples

## Plant sterol determination

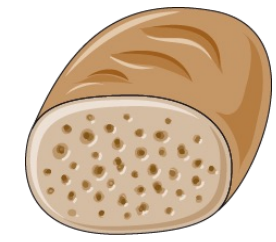

Rye bread

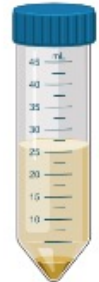

BF

### Fat extraction

Only for rye bread

Hexane:diethylether  
(1:1, v/v)  
H: 400 rpm/10'  
C: 500 rpm/10'

### Hot saponification

Saturated KOH  
80 °C/30'

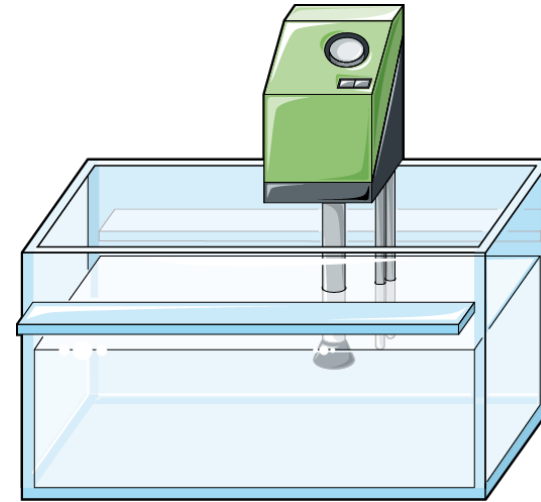

### Unsaponifiable extraction

Ultrapure water  
Cyclohexane  
400 rpm/10'



SamplesPlant sterol determination

Rye bread



BF

## Fat extraction

Only for rye bread

Hexane:diethylether  
(1:1, v/v)  
H: 400 rpm/10'  
C: 500 rpm/10'

Hot  
saponification

Saturated KOH  
80 °C/30'

Unsaponifiable  
extraction

Ultrapure water  
Cyclohexane  
400 rpm/10'

## Derivatization

Pyridine:HMDS:TMCS  
(5:2:1, v/v/v) 40°C/ 25'

TMSE

SamplesPlant sterol determination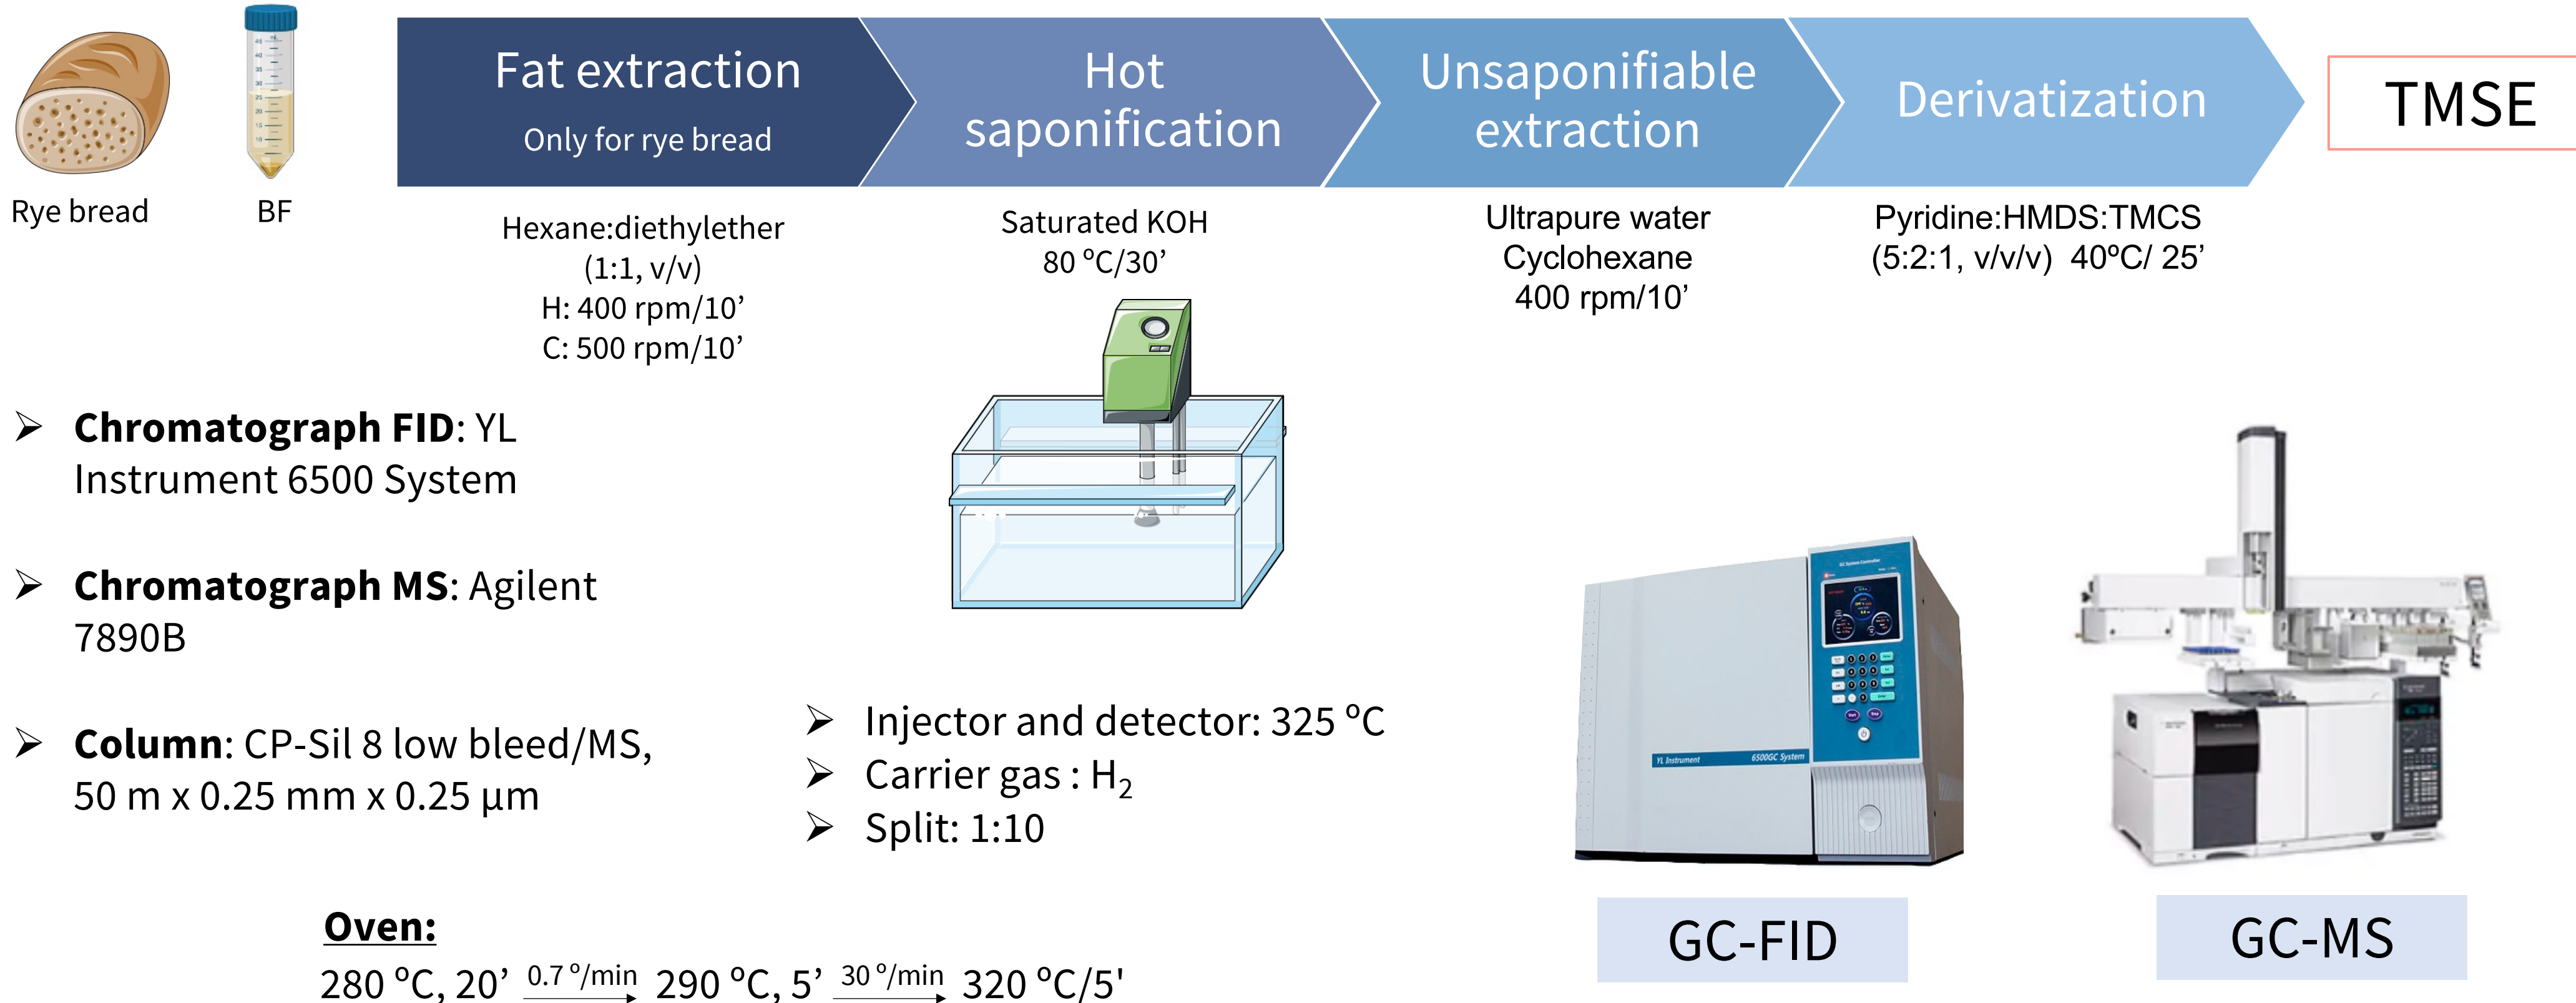

Plant sterol contents in rye bread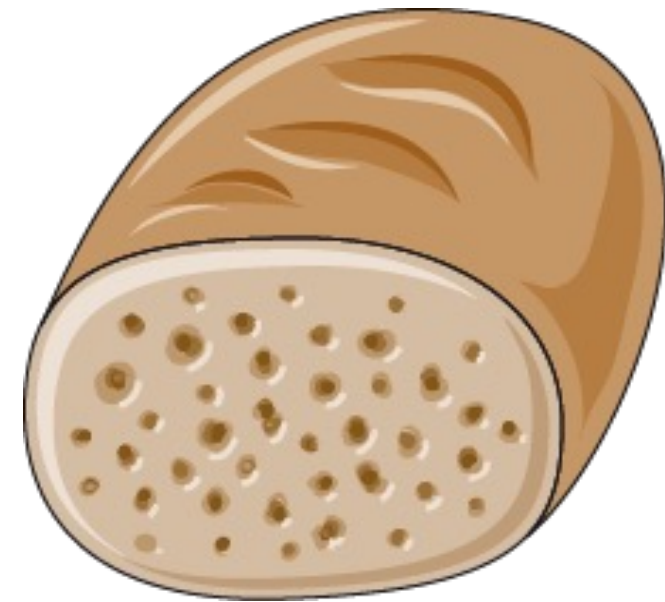

1.8 g PS/80 g

$\beta$ -Sitosterol

Sitostanol

Campesterol

Campestanol

$\Delta^5$ -Avenasterol

$\Delta^7$ -Stigmastenol

Stigmasterol

$\Delta^7$ -Avenasterol

$\Delta^5, 24$ -Stigmastadienol

Plant sterol contents in rye bread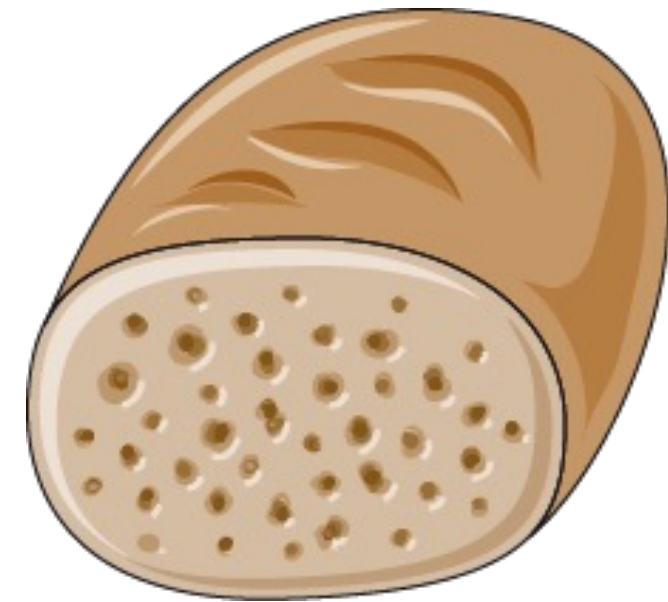

1.8 g PS/80 g

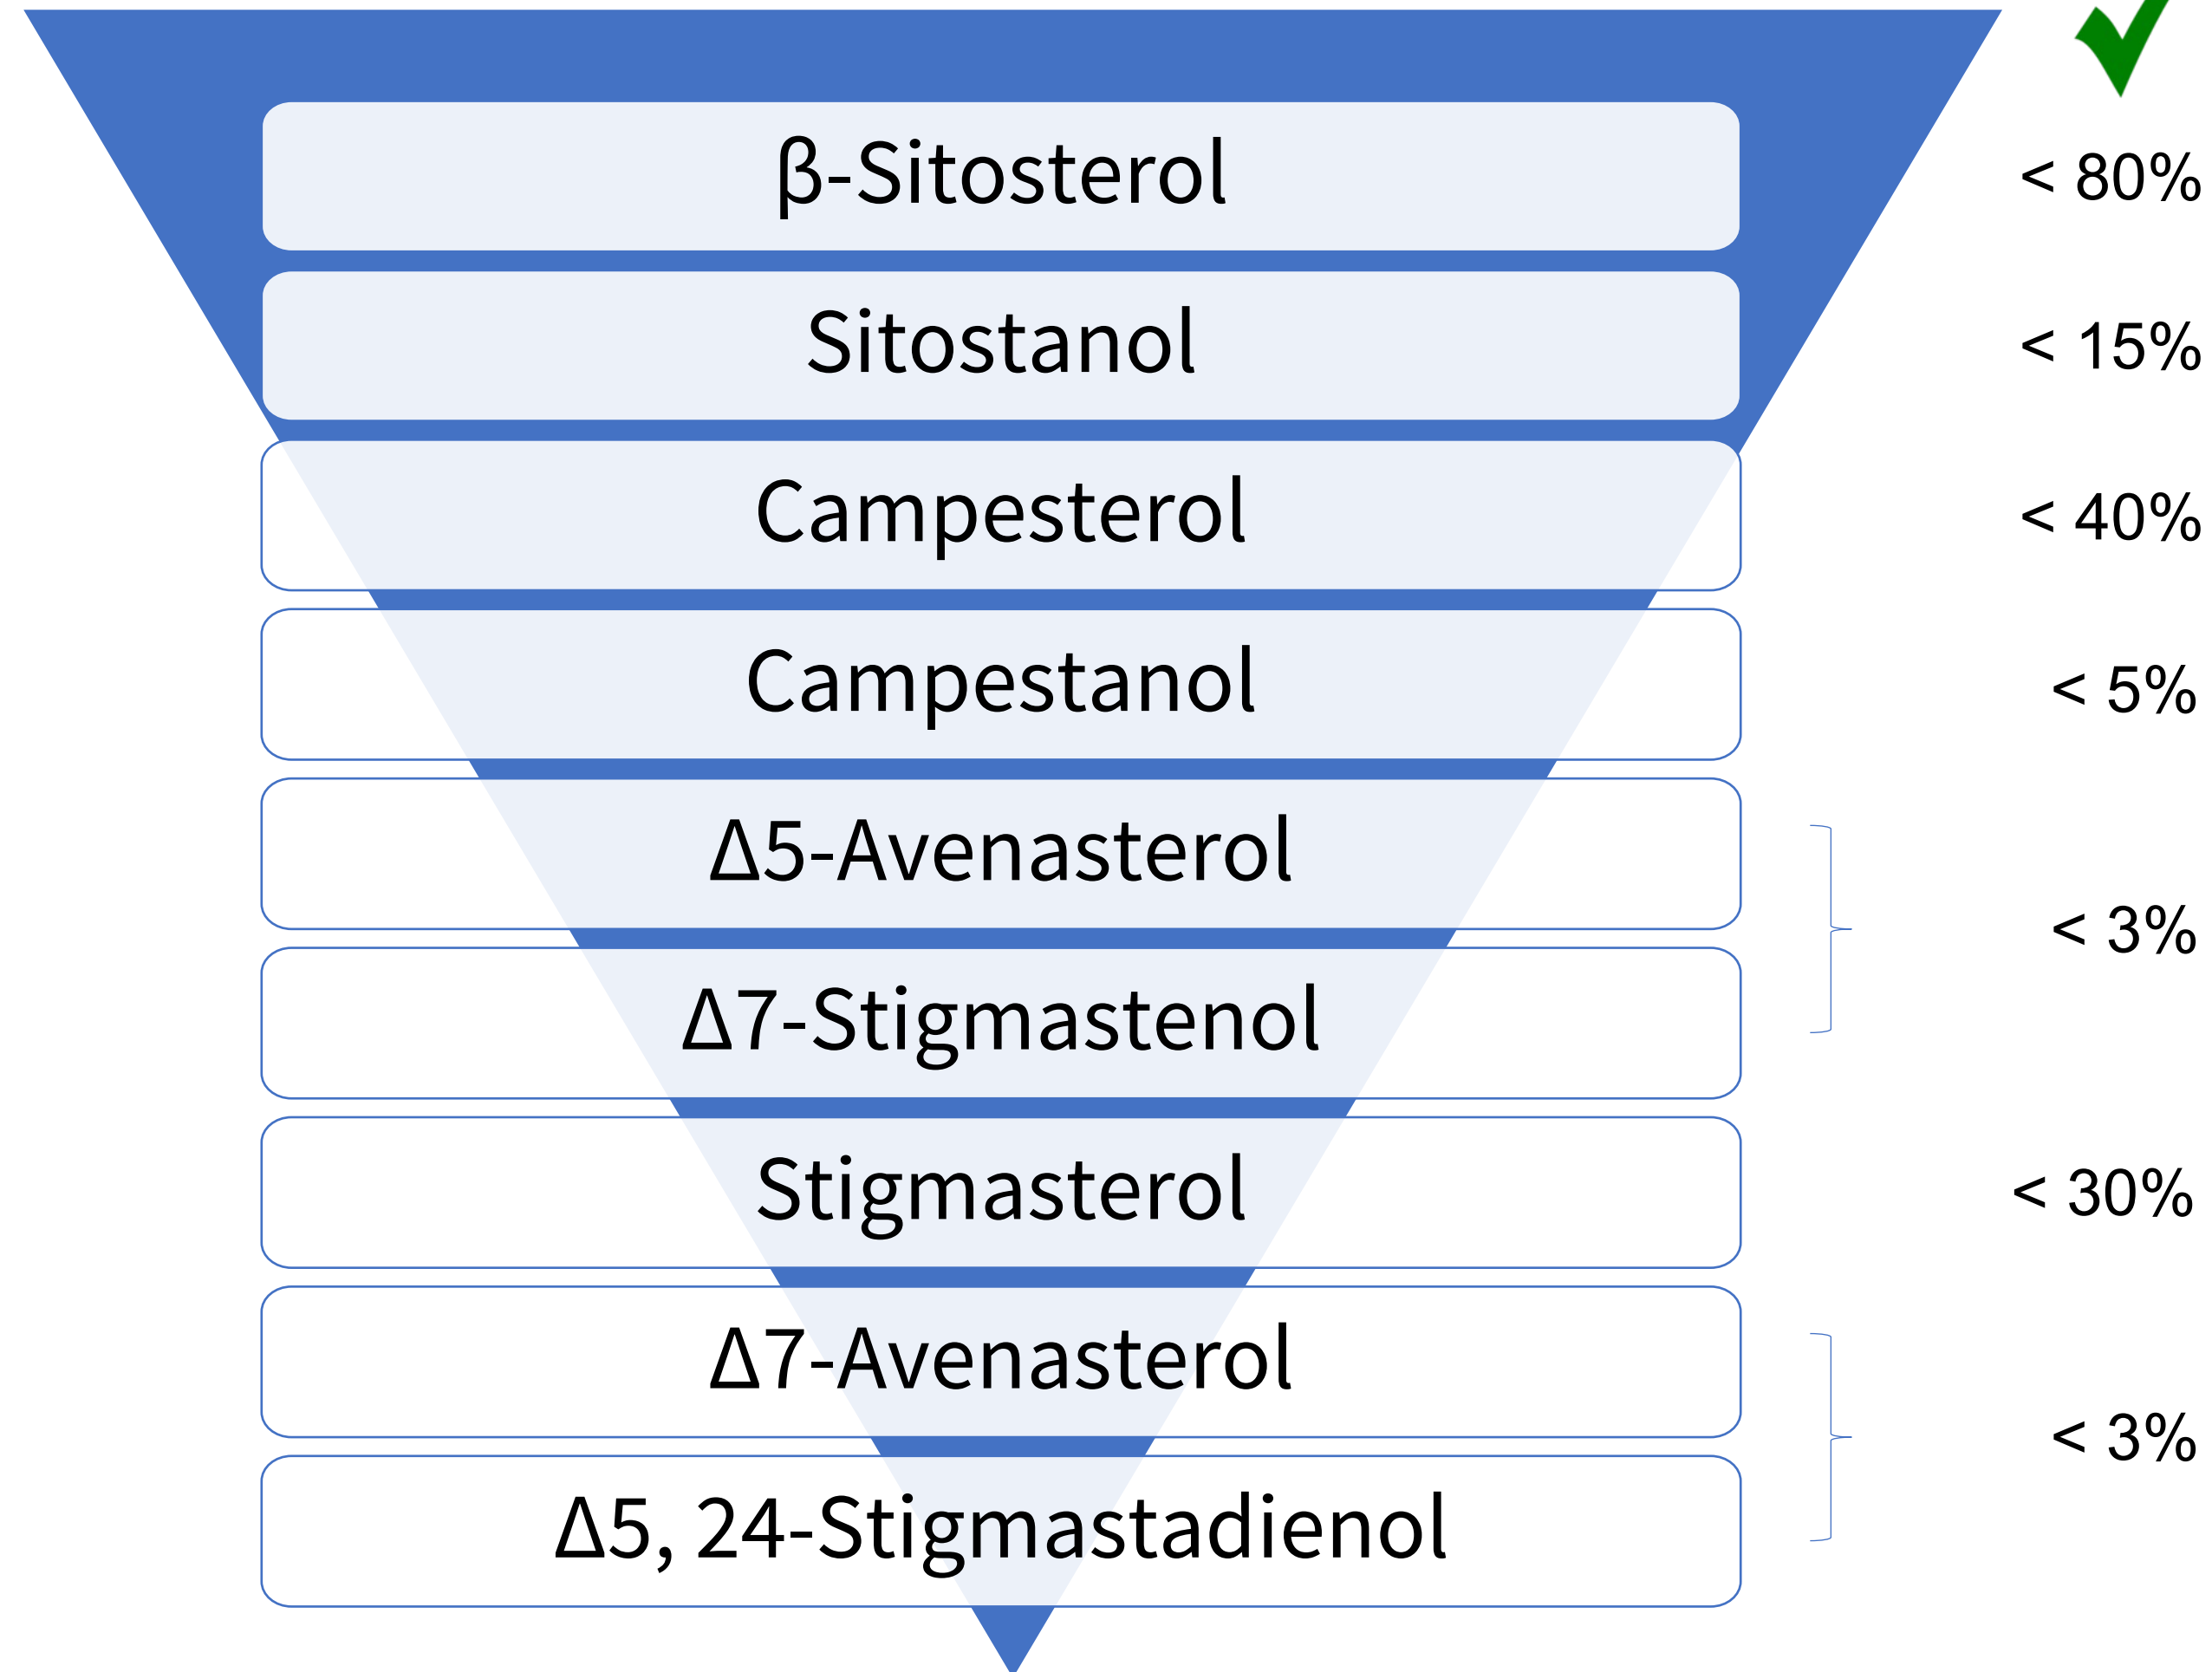

## Plant sterol bioaccessibility in rye bread

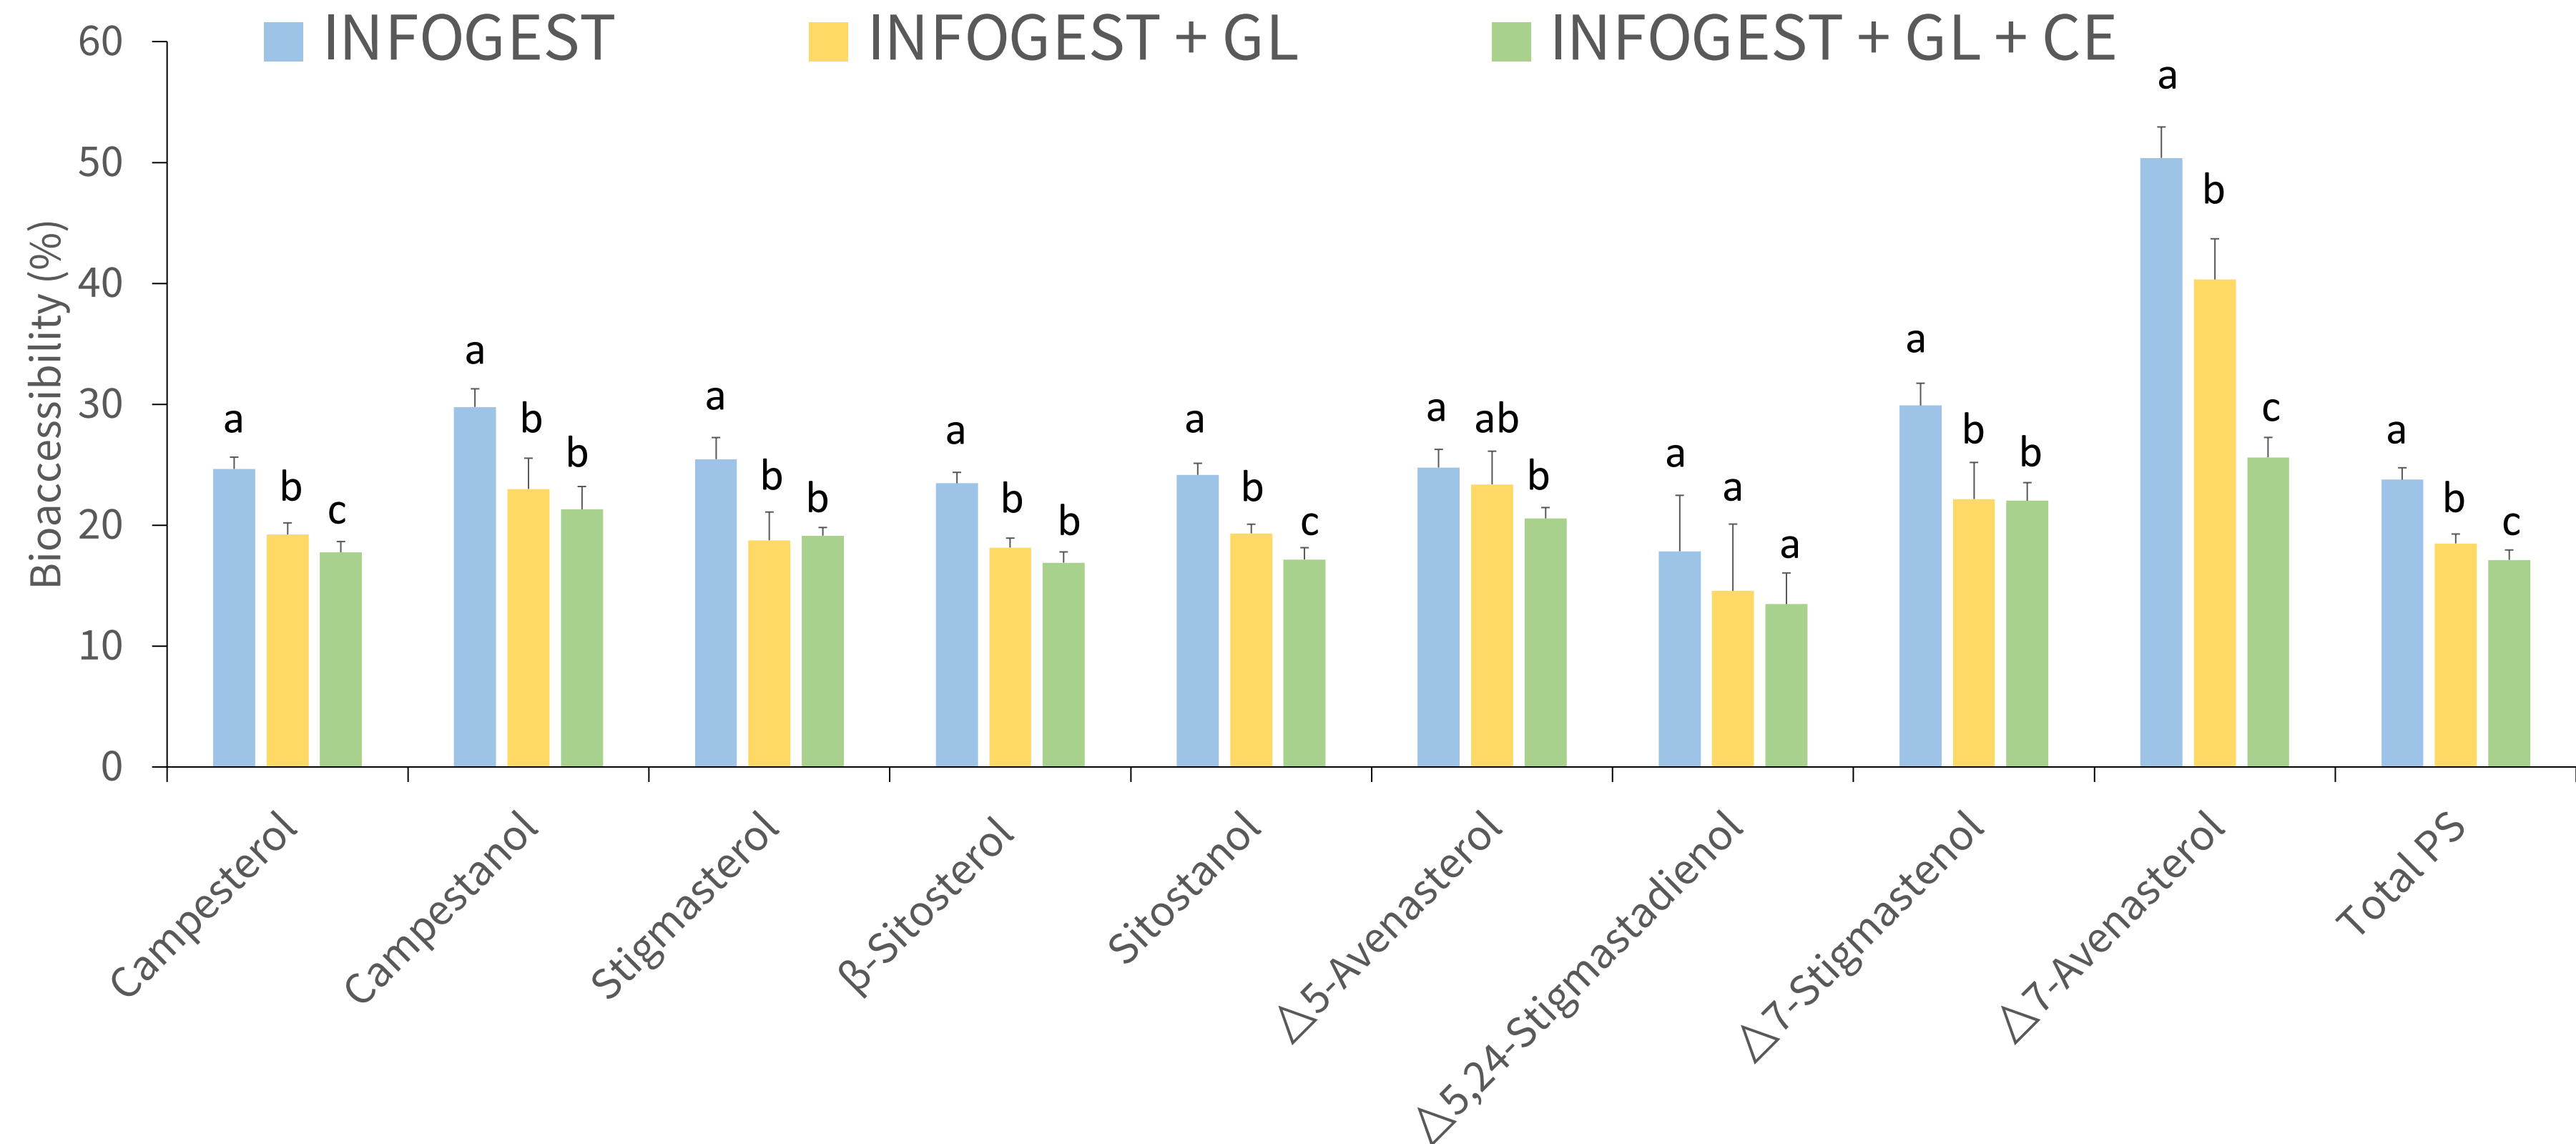

## Plant sterol bioaccessibility in rye bread

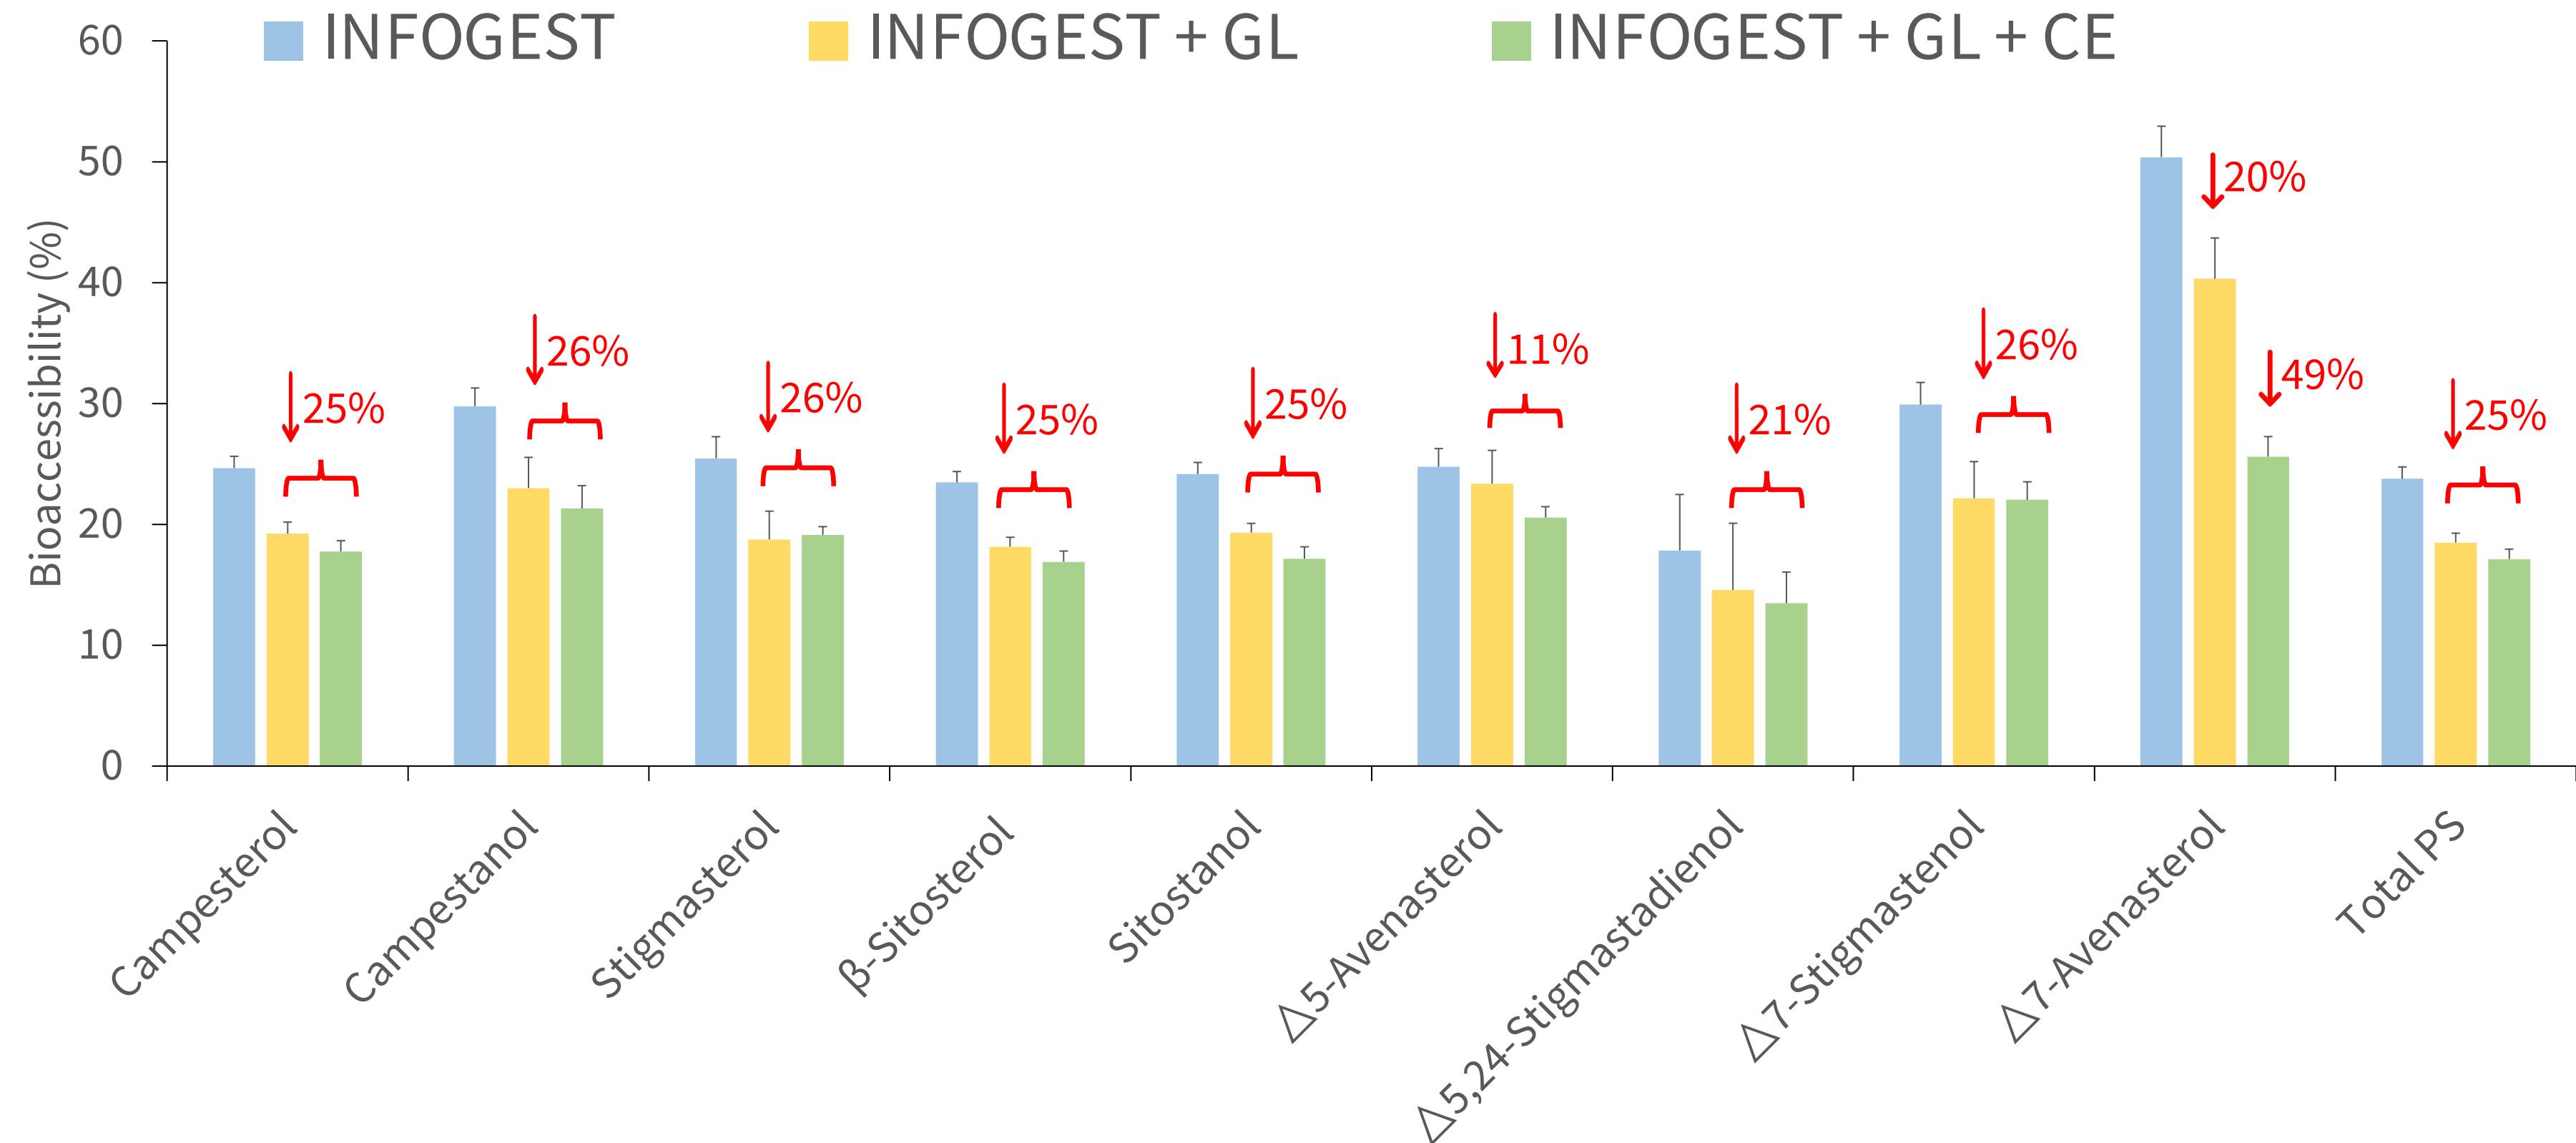

## Plant sterol bioaccessibility in rye bread

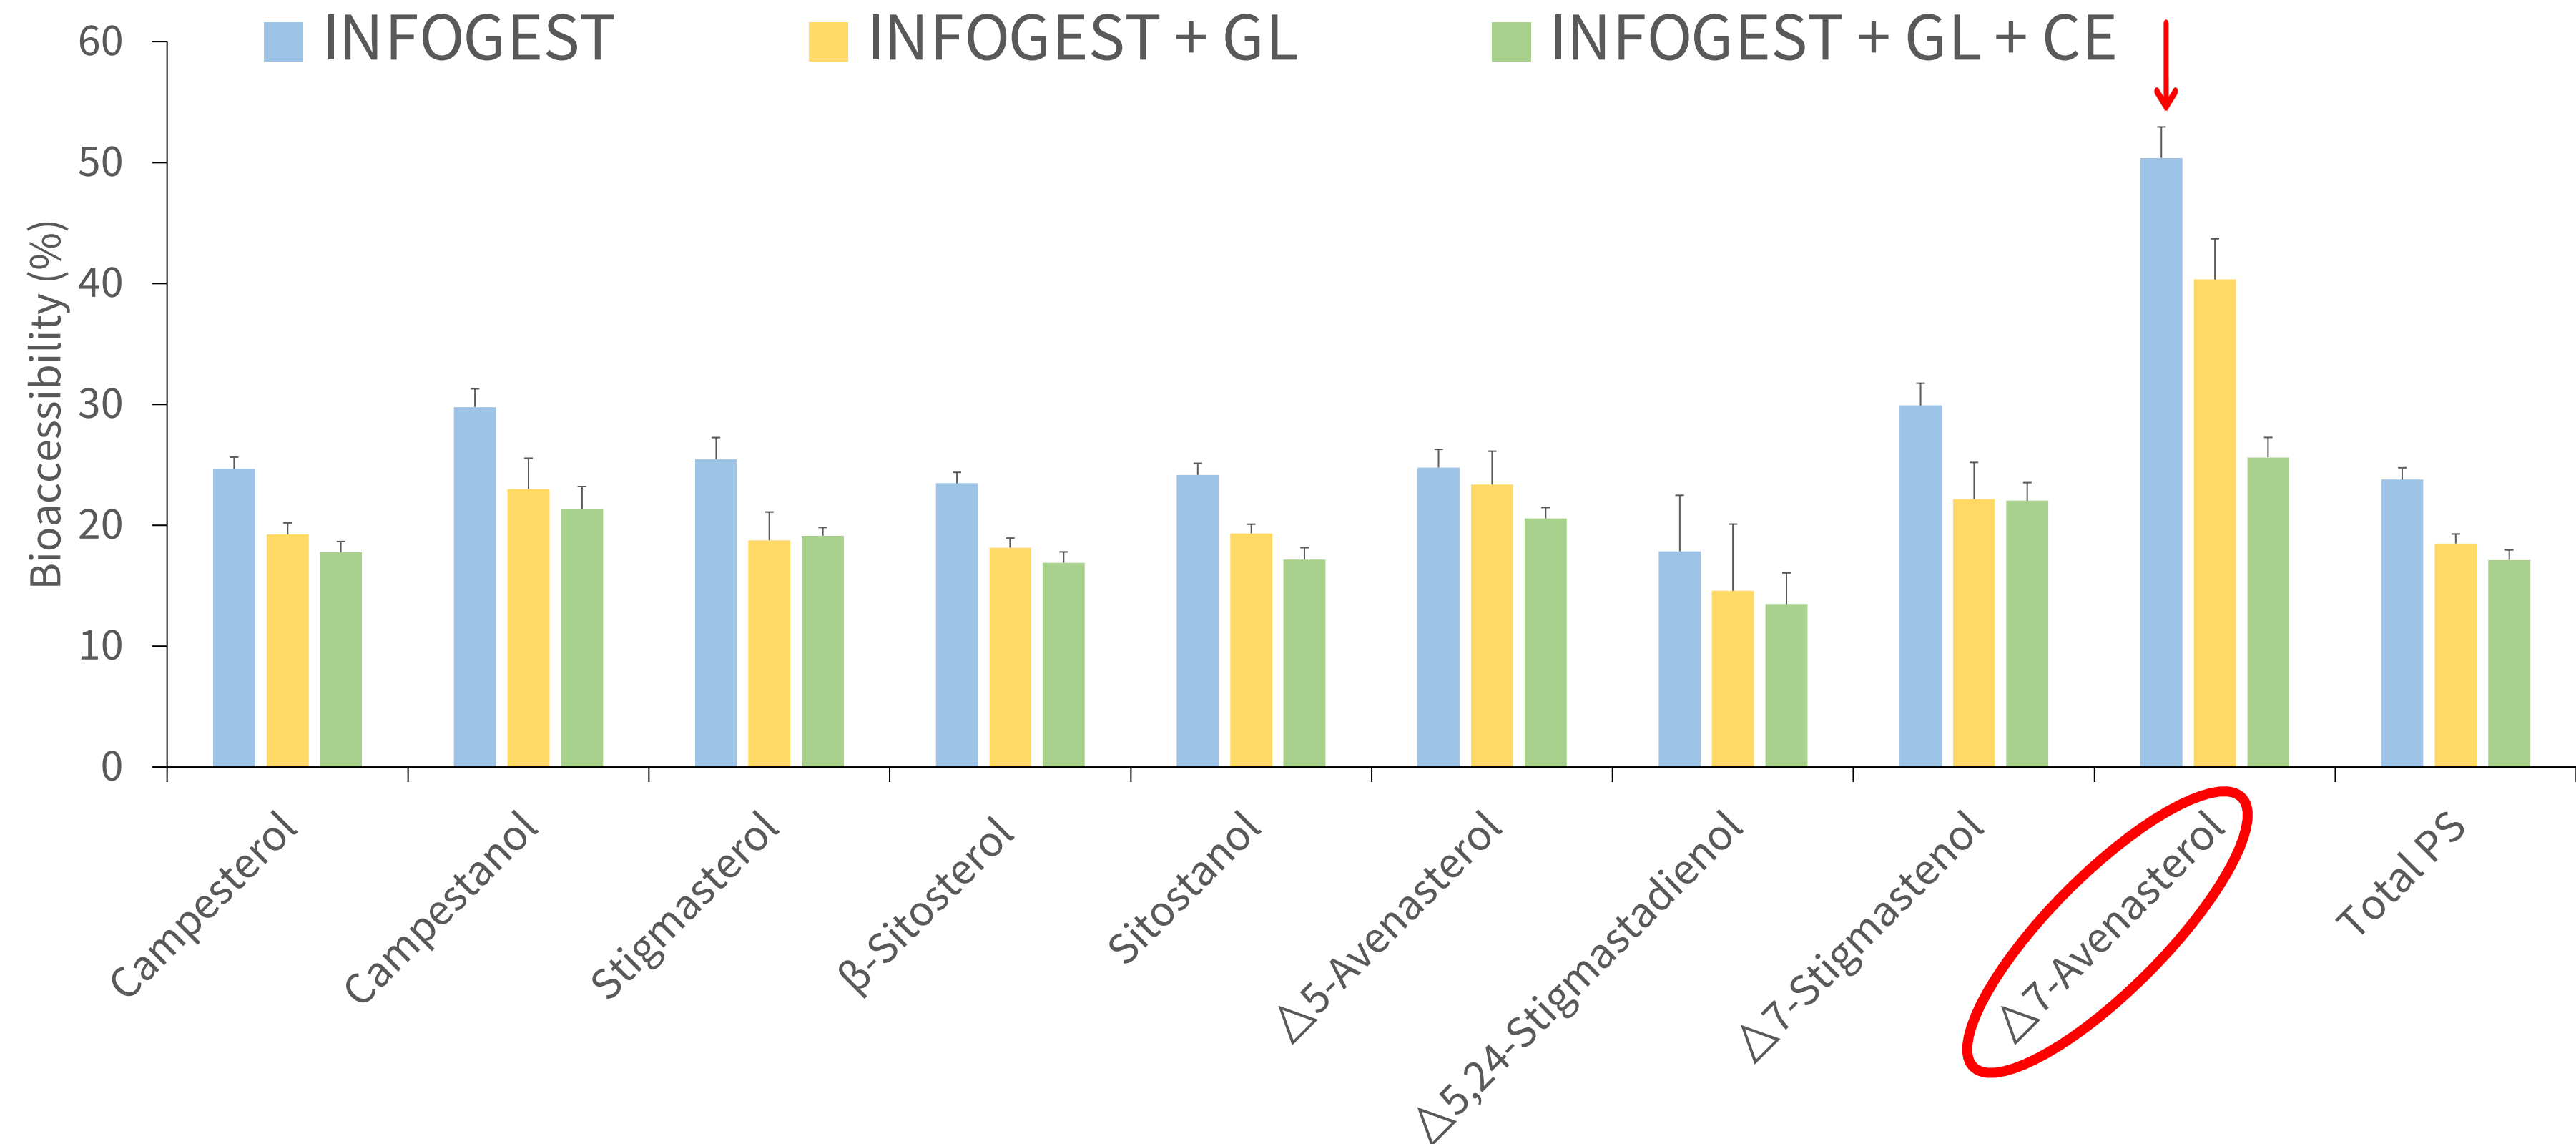



## Plant sterol bioaccessibility in rye bread

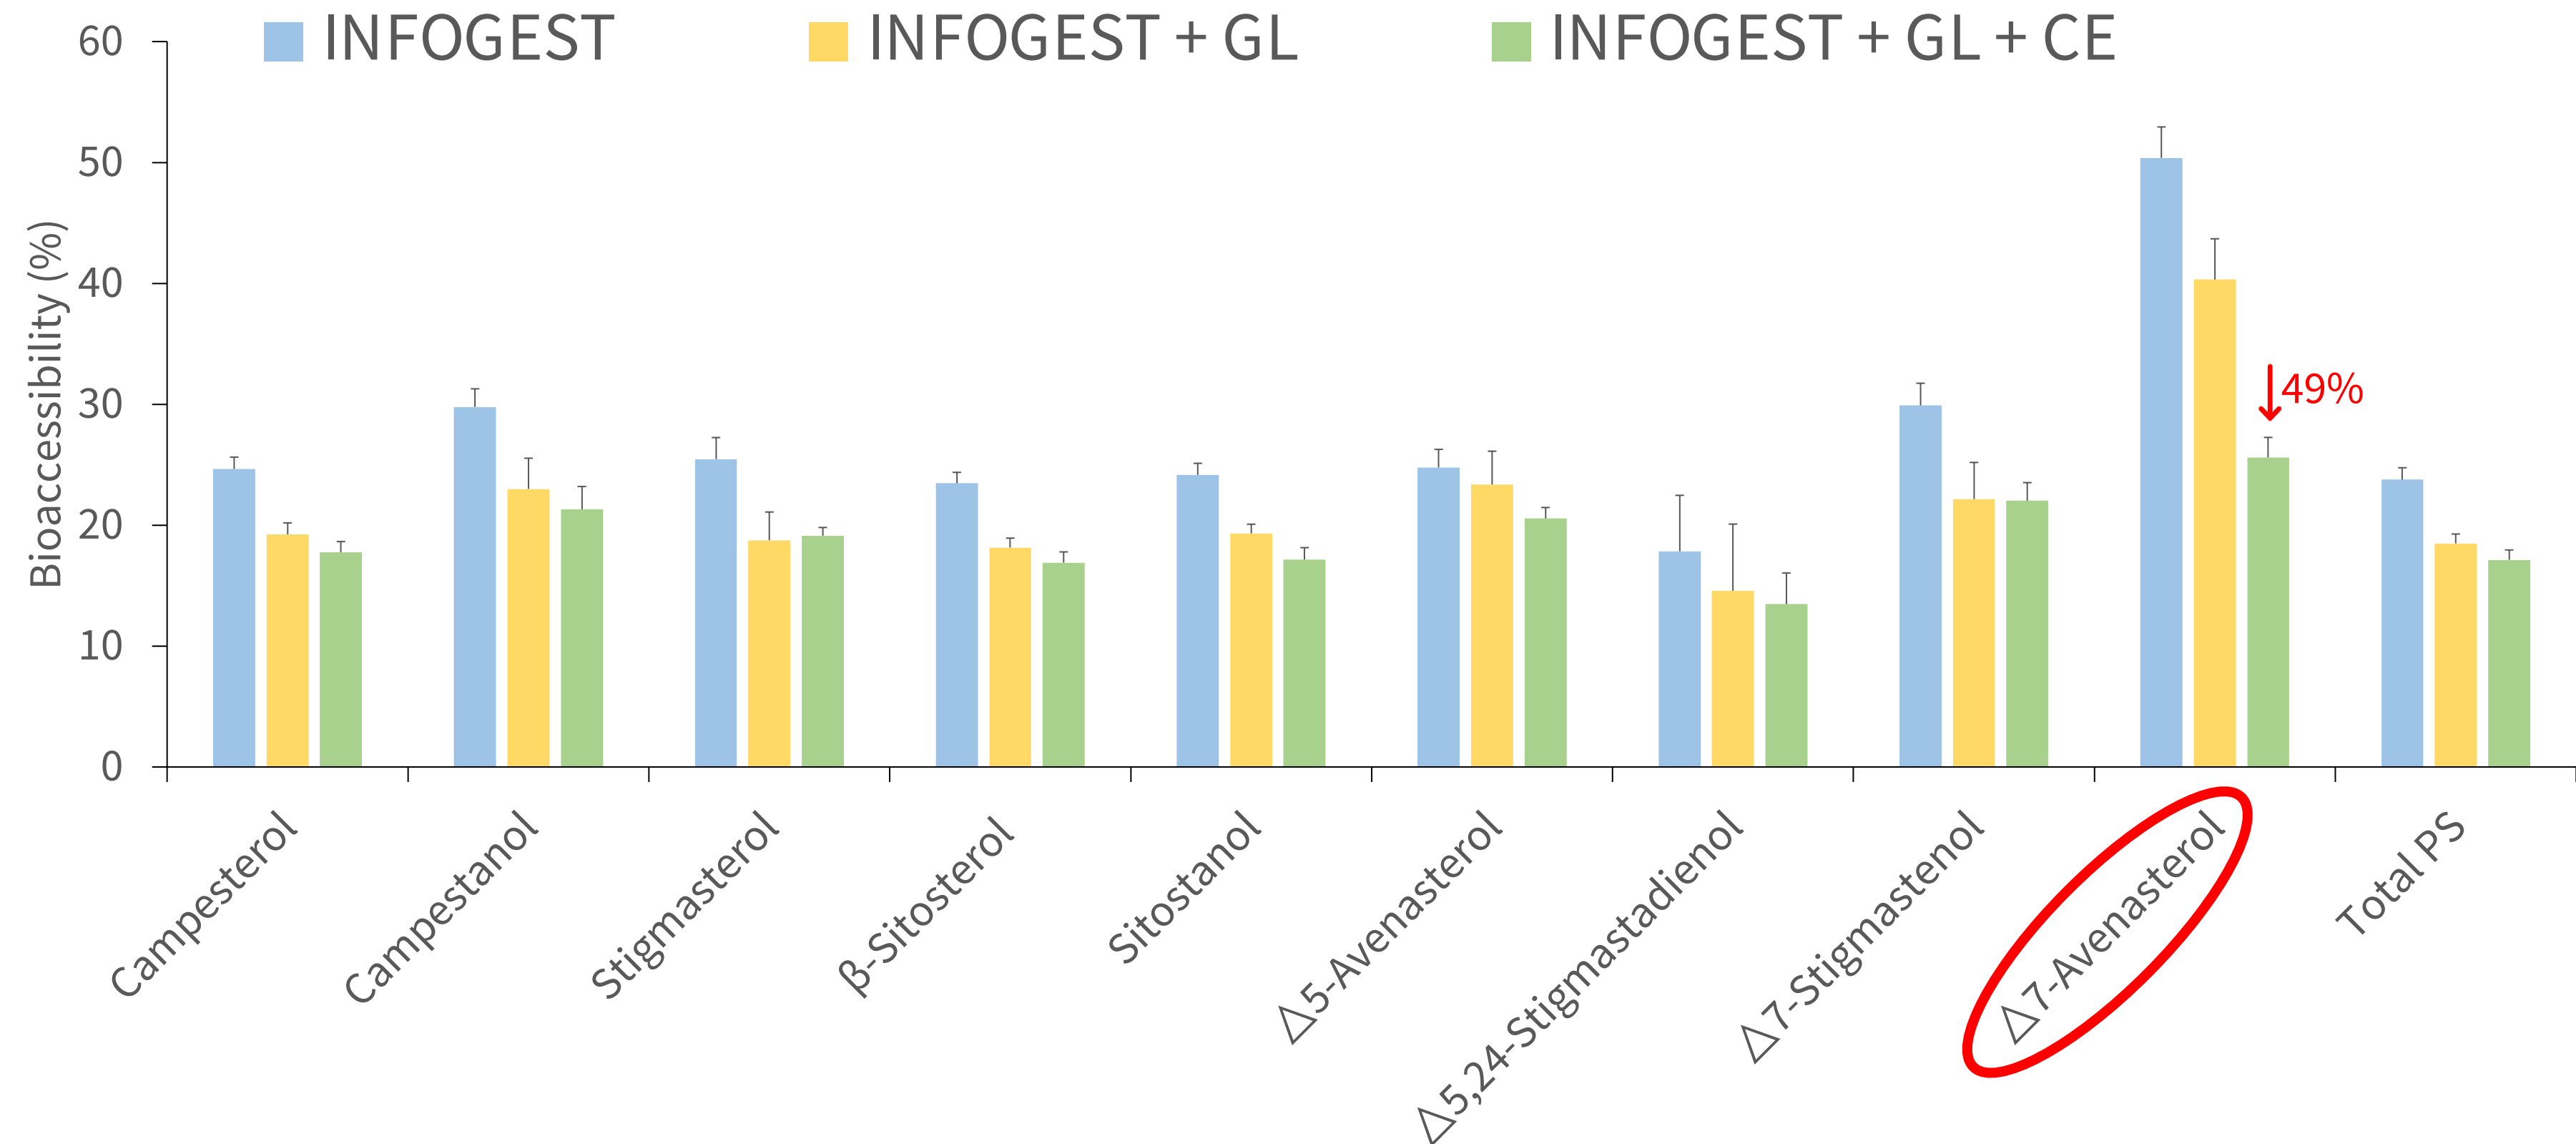



GL contribution  
to TG lipolysis

Solid foods → **10%**

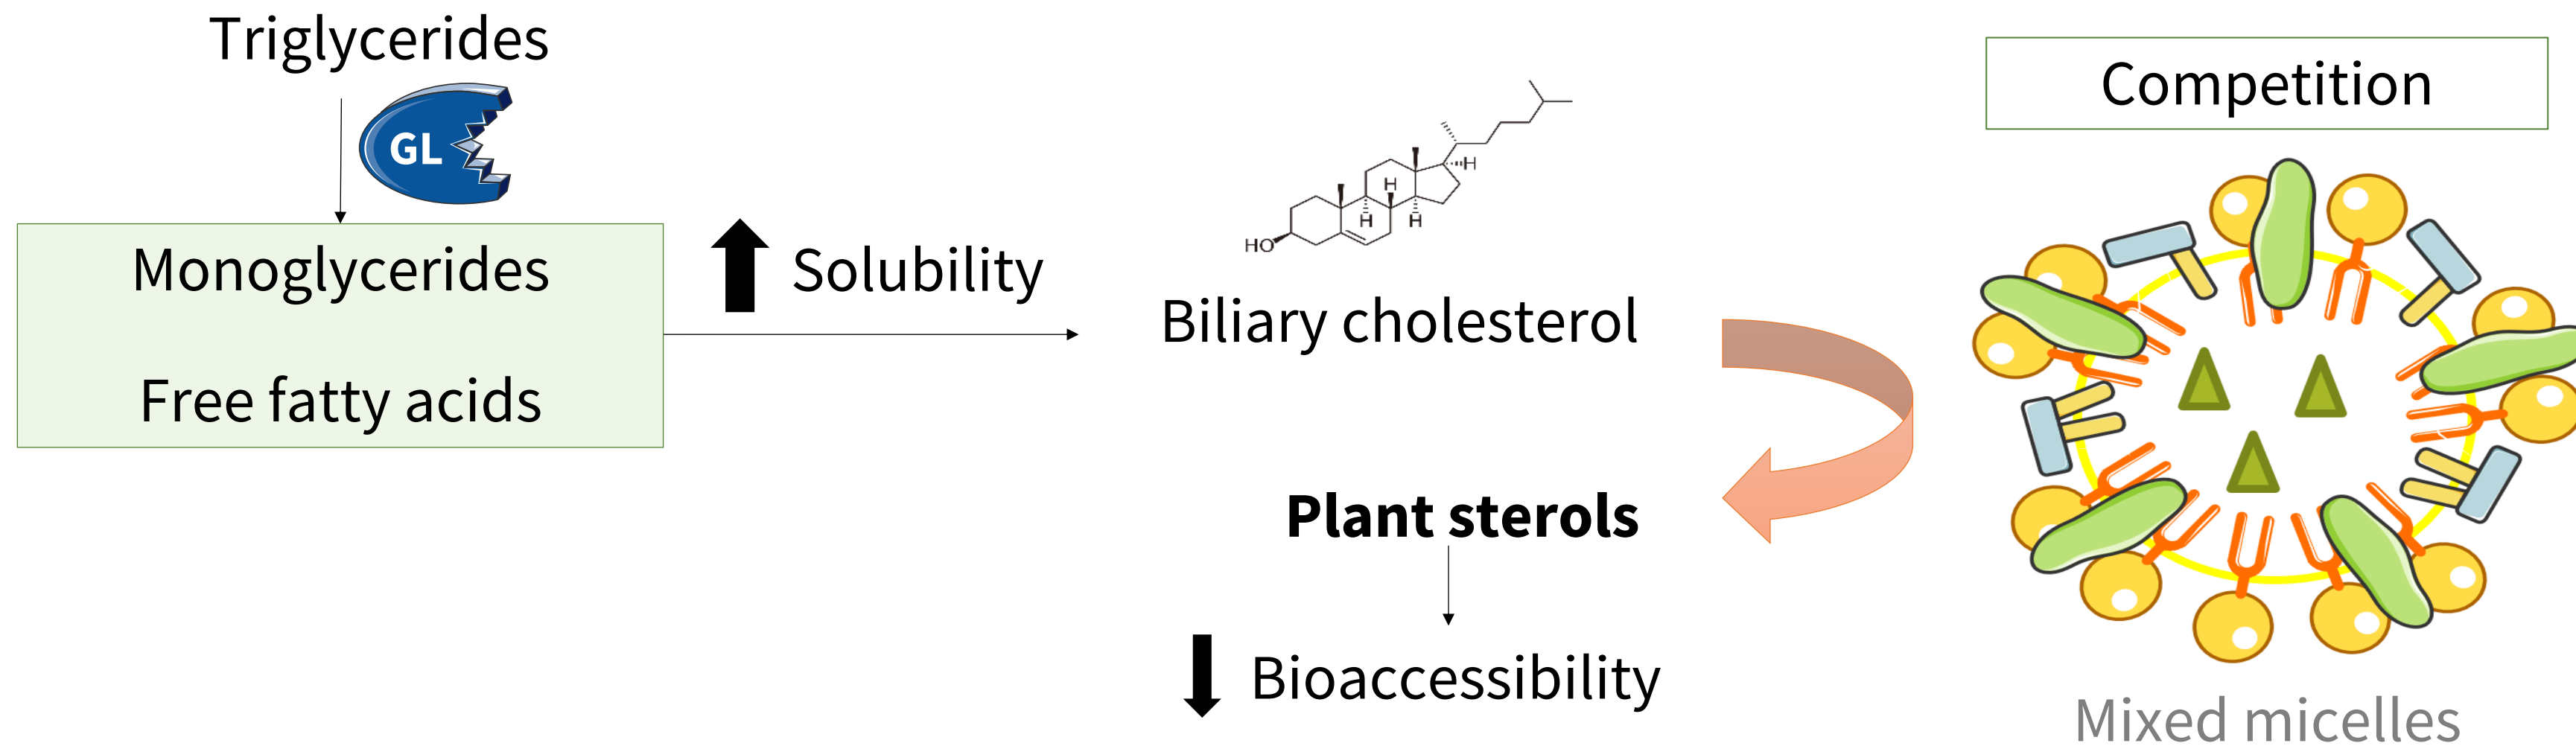

GL contribution  
to TG lipolysis

Solid foods → **10%**

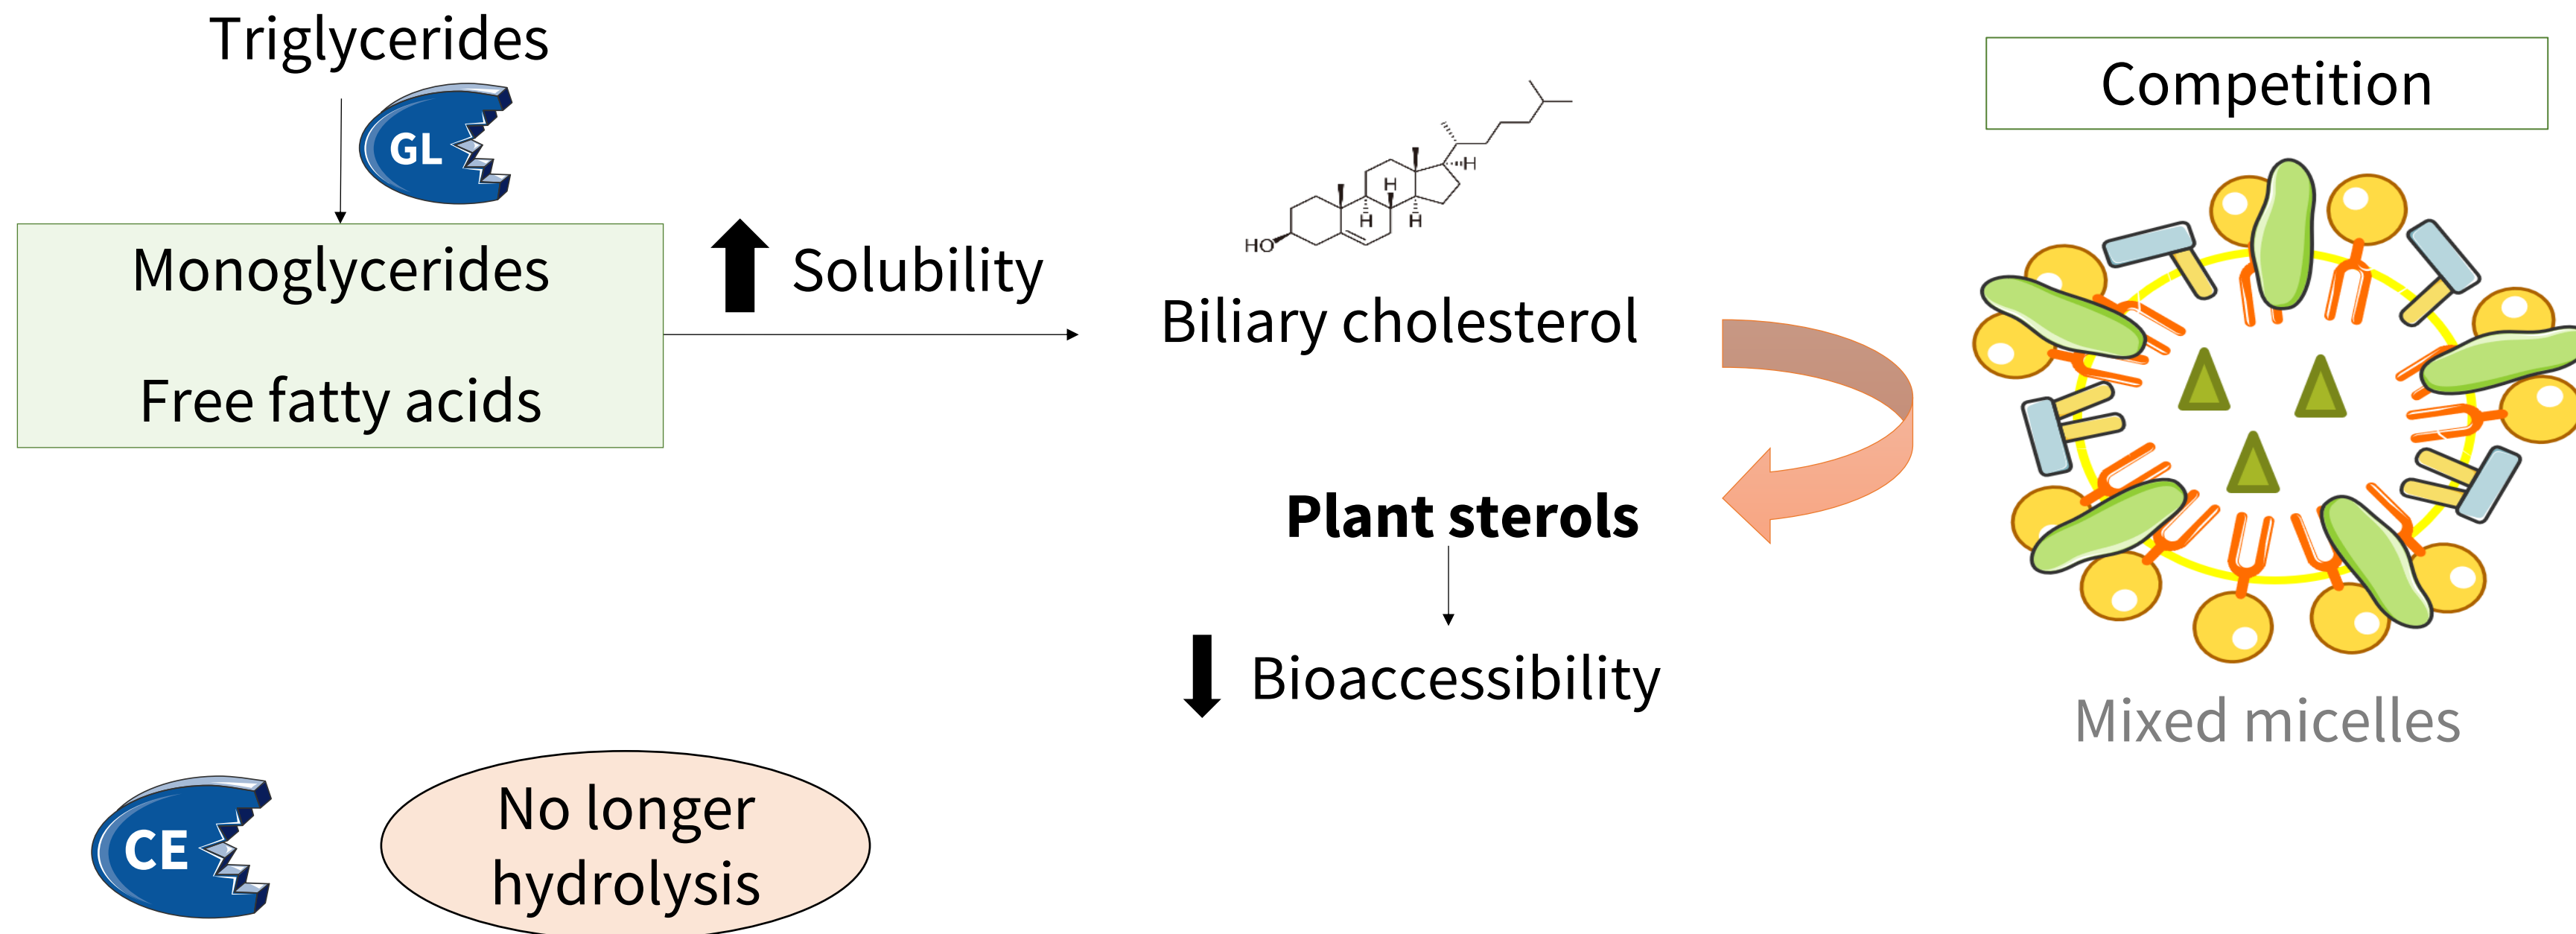

The use of gastric lipase and cholesterol esterase implies a closer approach to *in vivo* conditions, and we propose their inclusion in the INFOGEST model for the evaluation of the bioaccessibility of plant sterols and other lipidic bioactive compounds.

# Gastric lipase and cholesterol esterase in the INFOGEST model: evaluation of sterol bioaccessibility in plant sterol-enriched wholemeal rye bread

**¡Thank you for your attention!**

**Nerea Faubel** (nefaufe@alumni.uv.es)
